# A systematic review of 454 randomized controlled trials using the Dermatology Life Quality Index: experience in 69 diseases and 43 countries

Jui Vyas<sup>1</sup>, Jeffrey R. Johns<sup>2</sup>, Faraz M. Ali<sup>2</sup>, Ravinder K. Singh<sup>2</sup>, John R. Ingram<sup>2</sup>, Sam Salek<sup>3</sup> and Andrew Y. Finlay<sup>2</sup>

<sup>1</sup>Centre for Medical Education and <sup>2</sup>Division of Infection and Immunity, School of Medicine, Cardiff University, Cardiff, UK

<sup>3</sup>School of Life and Medical Sciences, University of Hertfordshire, Hatfield, UK

J.V. and J.R.J. are joint first authors.

Correspondence: Jui Vyas. Email: [VyasJJ@cardiff.ac.uk](mailto:VyasJJ@cardiff.ac.uk)

## Abstract

**Background** Over 29 years of clinical application, the Dermatology Life Quality Index (DLQI) has remained the most used patient-reported outcome (PRO) in dermatology due to its robustness, simplicity and ease of use.

**Objectives** To generate further evidence of the DLQI's utility in randomized controlled trials (RCTs) and to cover all diseases and interventions.

**Methods** The methodology followed PRISMA guidelines and included seven bibliographical databases, searching articles published from 1 January 1994 until 16 November 2021. Articles were reviewed independently by two assessors, and an adjudicator resolved any opinion differences.

**Results** Of 3220 screened publications, 454 articles meeting the eligibility criteria for inclusion, describing research on 198 190 patients, were analysed. DLQI scores were primary endpoints in 24 (5.3%) of studies. Most studies were of psoriasis (54.1%), although 69 different diseases were studied. Most study drugs were systemic (85.1%), with biologics comprising 55.9% of all pharmacological interventions. Topical treatments comprised 17.0% of total pharmacological interventions. Nonpharmacological interventions, mainly laser therapy and ultraviolet radiation treatment, comprised 12.2% of the total number of interventions. The majority of studies (63.7%) were multicentric, with trials conducted in at least 42 different countries; 40.2% were conducted in multiple countries. The minimal clinically importance difference (MCID) was reported in the analysis of 15.0% of studies, but only 1.3% considered full score meaning banding of the DLQI. Forty-seven (10.4%) of the studies investigated statistical correlation of the DLQI with clinical severity assessment or other PRO/quality of life tools; and 61–86% of studies had within-group scores differences greater than the MCID in 'active treatment arms'. The Jadad risk-of-bias scale showed that bias was generally low, as 91.8% of the studies had Jadad scores of  $\geq 3$ ; only 0.4% of studies showed a high risk of bias from randomization. Thirteen per cent had a high risk of bias from blinding and 10.1% had a high risk of bias from unknown outcomes of all participants in the studies. In 18.5% of the studies the authors declared that they followed an intention-to-treat protocol; imputation for missing DLQI data was used in 34.4% of studies.

**Conclusions** This systematic review provides a wealth of evidence of the use of the DLQI in clinical trials to inform researchers' and clinicians' decisions for its further use. Recommendations are also made for improving the reporting of data from future RCTs using the DLQI.

### What is already known about this topic?

- The Dermatology Life Quality Index (DLQI) has been used in clinical practice and research for 29 years and continues to be the most frequently used patient-reported outcome (PRO) tool for dermatology.
- Previous systematic reviews of the DLQI have focused on psoriasis, biologics or validation of the DLQI.

### What does this study add?

- This systematic review covers RCTs in 68 diseases and a wide range of interventions in 68 diseases.
- Details of study settings and countries, numbers of patients recruited, ages and DLQI score changes and assessment periods are summarized.

Accepted: 14 March 2023

© The Author(s) 2023. Published by Oxford University Press on behalf of British Association of Dermatologists. This is an Open Access article distributed under the terms of the Creative Commons Attribution License (<https://creativecommons.org/licenses/by/4.0/>), which permits unrestricted reuse, distribution, and reproduction in any medium, provided the original work is properly cited.

- Studies where the minimal clinically important difference was achieved are identified and analysed, with a comprehensive analysis of bias.
- DLQI scores were the primary endpoints in 24 (5.3%) of the RCTs.
- The results inform future users of the DLQI, confirm the extensive experience of its use in dermatology RCTs and demonstrate the DLQI as the patient-reported outcome measure of choice.
- Evidence is provided to aid researchers and clinicians in the use of the DLQI in routine clinical practice.

The Dermatology Life Quality Index (DLQI) is the most widely used dermatology patient-reported outcome (PRO) measure in routine practice and clinical trials,<sup>1,2</sup> because of the simplicity of reporting and application, a single meaningful summary score, its ease of completion in 2 min,<sup>3</sup> comparability between studies and over time due to there being only a single version of the tool, and wide language accessibility.<sup>4</sup> It is embedded in national guidelines and disease registries in more than 45 countries and is available in 138 translations.<sup>5</sup> However, users of the DLQI need structured access to evidence concerning its use. This should include the score changes seen (and to be expected) in intervention studies, and the range of diseases where it has been of value as an outcome measure.

Previous reviews of the DLQI focused on its use in psoriasis,<sup>6–8</sup> biologics<sup>7,9–11</sup> or validation<sup>2,12–14</sup> and clinical results.<sup>15</sup> This systematic review is the first to investigate the use of the DLQI from its inception in 1994 to 2021 in randomized controlled trials (RCTs) covering all diseases and both pharmacological and nonpharmacological interventions, and whether DLQI outcomes show beneficial effects of the interventions by statistically significant or clinically significant improved scores.

## Materials and methods

### Data sources

The study followed the 2020 PRISMA guidelines and checklist for the reporting of systematic reviews.<sup>16</sup> The study protocol and detailed search strategy were registered in PROSPERO (CRD42021290587) and are provided in Table S1 (see [Supporting Information](#)).<sup>17</sup> The MEDLINE (Ovid), Embase, Cochrane Library, CINAHL (EBSCO),

Web of Science, SCOPUS and PsycINFO databases were searched independently by two authors (J.V. and J.R.J.) from 1 January 1994 (DLQI creation) to 16 November 2021, and the results corroborated. Search terms included 'DLQI' and 'Dermatology Life Quality Index'. Database-specific 'article type/study type' keywords, language keywords (English) and age selection keywords were also used to search the required types of study to be included (e.g. medical subject heading terms for RCT). Duplicates were excluded.

### Search strategy/selection

The eligibility criteria for included studies are provided in Table 1. The search results were imported into EndNote20®, to keep track of references.<sup>18</sup> Two authors (J.V. and J.R.J.) independently compared the study titles and abstracts retrieved by searches against the inclusion and exclusion criteria and examined full texts that potentially met the criteria but whose abstracts lacked sufficient information. Rejected studies were recorded with reasoning. A third author (F.M.A.) resolved and recorded any study selection disagreements. The PRISMA flowchart gives search counts for inclusions and exclusions, and reasons for exclusions (Figure 1).<sup>16</sup>

Studies that did not include new DLQI data and previously published analyses were excluded, as were publications with no DLQI data (but use mentioned) and studies that combined previously randomized treatment arms, so that only single-arm (no longer randomized) DLQI data were presented.

### Outcome measures extracted

Information recorded included the study aim, disease studied, disease severity, systemic/topical drugs or other interventions, DLQI data collection duration, the research setting (e.g. trial, hospital, clinic or community), whether it was single

**Table 1** Eligibility criteria for study selection

| Variable | Inclusion                                                                                                                                                                                                                                                 | Exclusion                                                                                                                                                                                             |
|----------|-----------------------------------------------------------------------------------------------------------------------------------------------------------------------------------------------------------------------------------------------------------|-------------------------------------------------------------------------------------------------------------------------------------------------------------------------------------------------------|
| Patients | Adults $\geq 18$ years, any gender, ethnicity, setting, country<br>Any inflammatory and noninflammatory dermatological conditions                                                                                                                         |                                                                                                                                                                                                       |
| Methods  | Interventional RCTs published as full papers in peer-reviewed journals (including crossover trials and trials with OLEs if initial treatment was continued after study completion)<br>Published between 1 January 1994 and 16 November 2021               | Not in English language<br><br>'Grey' literature, including dissertations, conference abstracts, conference proceedings, reports, editorials, letters to editors, commentaries, protocols and reviews |
| Outcomes | Interventions included any drug, therapeutic intervention and alternative medicines, e.g. acupuncture, fire needle, Chinese traditional (herbal) medicine, Ayurvedic, and educational or lifestyle interventions<br>DLQI was primary or secondary outcome | No DLQI data provided                                                                                                                                                                                 |

DLQI, Dermatology Life Quality Index; OLE, open-label extension; RCT, randomized controlled trial.

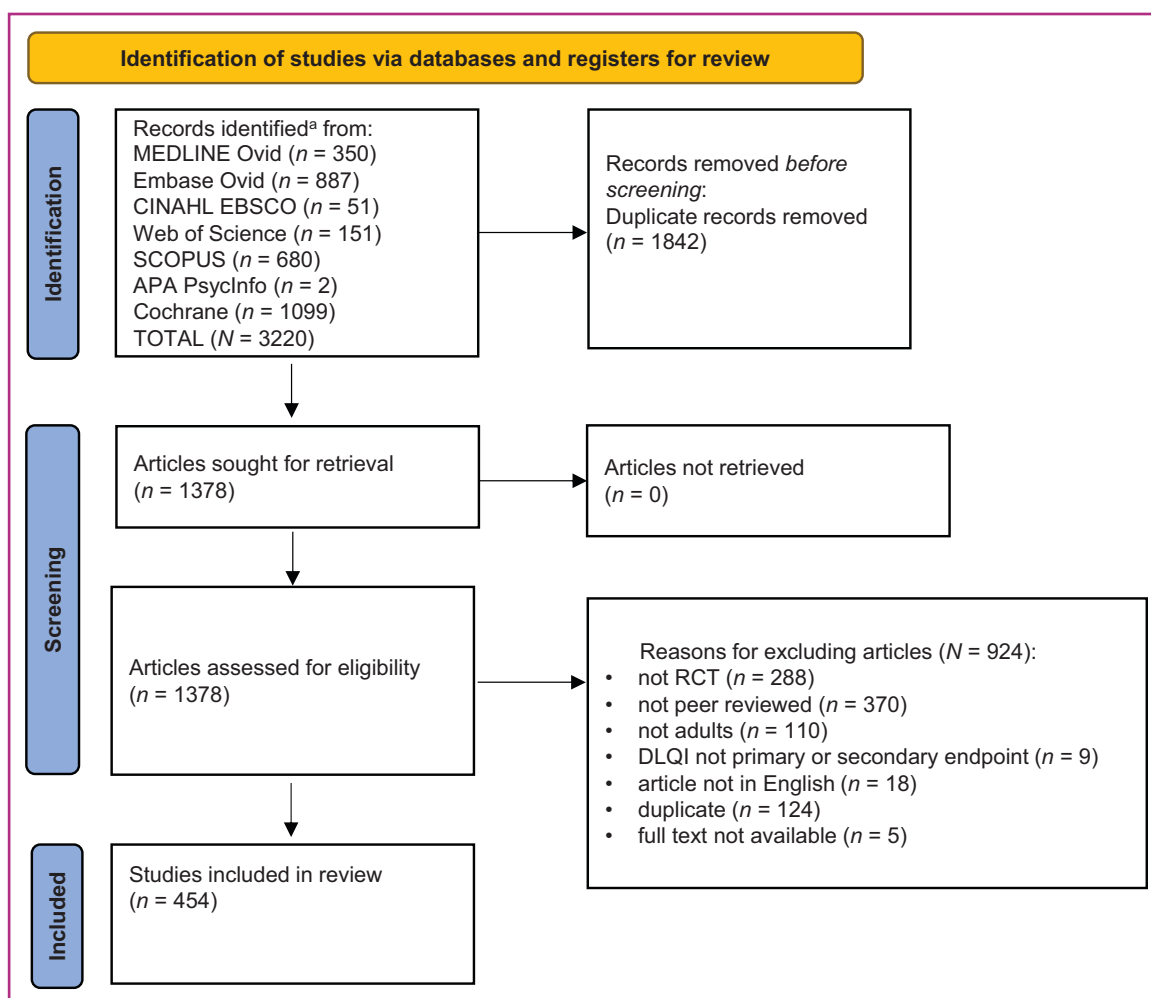

**Figure 1** PRISMA flow diagram of article selection. DLQI, Dermatology Life Quality Index; RCT, randomized controlled trial. <sup>a</sup>Inclusion criteria applied by search engine, where applicable (i.e. RCT, adult, English language, journal article and peer reviewed).

or multicentred (number of sites), patient demographics (mean or median age, gender, ethnicity stated, country), the number of participants randomized to each intervention group, and whether DLQI score was a primary or secondary endpoint.

Data were extracted from up to three arms for each study: generally, a control or placebo/comparator arm and up to two intervention arms. Where studies reported multiple dosage strengths for the same drug, only data from the highest dosage arms were extracted. Therapeutic, nonpharmaceutical interventions were also recorded.

If studies did not report primary data but extracted data from previously published RCTs and performed post hoc-style analysis, data were obtained from the original RCTs, particularly on methodology and study design. Sometimes these elements and DLQI score data were supplied in supplementary data files, which were also consulted. Drug registrations (e.g. National Institutes of Health and ClinicalTrials.gov) were consulted for data on study protocols, particularly the location of studies and number of sites used, if not provided in the articles themselves.

Outcomes recorded that were related to the DLQI were total or median scores at baseline and study endpoint, or score differences (if given) for each arm. Evidence of statistically significant and/or clinically significant change [based on

minimal clinically important difference (MCID)] were noted, and whether the DLQI was correlated with other PRO or quality of life (QoL) instruments. Using several PRO measures in combination and/or with disease severity scales in a study may achieve a better understanding of patient outcomes (e.g. capture difference aspects of QoL), or identify disease-specific, as well as general outcome aspects. Thus, other PRO tools or QoL measures used in combination with the DLQI were recorded to inform those seeking to use the DLQI (or one of the other outcome measures we captured).

### Data extraction and synthesis

For data extraction, we followed the guidance of the Cochrane Handbook for Systematic Reviews of Interventions.<sup>19</sup> A REDCap database (a secure web application for building/managing online surveys and databases)<sup>20–22</sup> was created based on the Cochrane Handbook version 6.2 and the updated guidance recommendations.<sup>19,23</sup> J.V. and J.R.J. independently extracted data from the included publications to parallel REDCap database tables, and an adjudicator (F.M.A.) resolved any disagreements over data extraction. Missing data were noted in the data templates, but none was sufficiently important to contact the original authors

about. Data were extracted from REDCap to Microsoft EXCEL for analysis of totals, means and percentages.

The two reviewers independently assessed the risk of bias (quality) of the included studies, using the Jadad scale.<sup>24,25</sup> Assessment of bias was made at the individual study level. The domains included in bias analysis were bias arising from the randomization process, bias due to blinding and bias due to not accounting for all patients. The appropriate reporting of baseline (i.e. imbalances in study arms) and whether any corrections were made in the analysis to account for baseline imbalance were also noted.

## Results

A total of 3220 studies were retrieved from the online database search. There were 1842 duplicates; the remaining 1378 underwent full-text assessment. Of these, 454 described research on 198 190 patients meeting the inclusion eligibility criteria (Figure 1). Published RCTs that used the DLQI are increasing exponentially, with 68 new studies reported in 2021 (Figure 2).

### Study sites and settings

One-third ( $n=154$ ; 33.9%) of the RCTs were single-site studies; the majority ( $n=289$ ; 63.7%) were multicentre studies, with 11 (2.4%) study locations being indeterminate. Sixty-four (14.1%) trials were conducted at two sites, 15 (3.3%) at 3–5 sites, 12 (2.6%) at 6–10 sites, 19 (4.2%) at 11–20 sites, 72 (15.9%) at 21–50 sites, 54 (11.9%) at 51–200 sites, 36 (7.9%) at 101–200 sites and 6 (1.3%) at > 200 sites.

Although the majority of studies ( $n=253$ ; 55.7%) failed to report the study setting(s), 97 (21.4%) studies were conducted in hospitals, 30 (6.6%) in clinics, 22 (4.8%) in trial centres, 23 (5.1%) in outpatient/ambulatory care and 29 (6.4%) in other settings.

Trials were conducted in at least 43 different countries, although 177 (39.0%) reported multiple countries without listing details (Table S2; see [Supporting Information](#)). The majority of studies conducted in a single country were

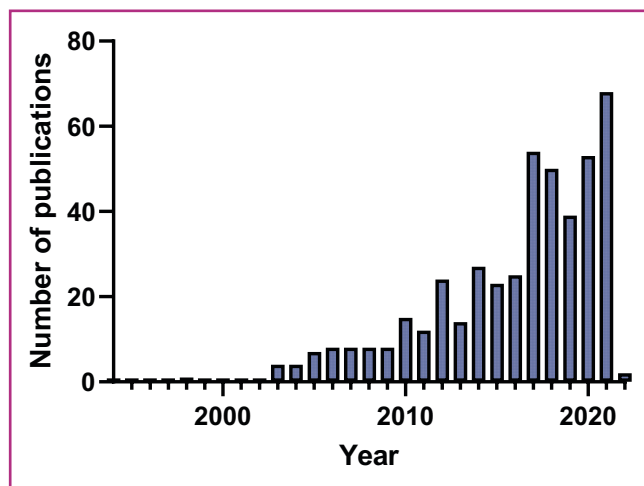

**Figure 2** Number of randomized control trial studies that have used the Dermatology Life Quality Index over time.

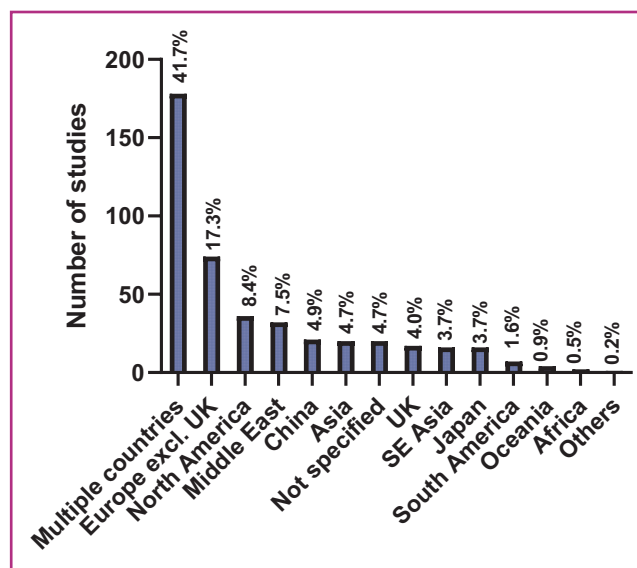

**Figure 3** Location of the included randomized controlled trials. SE, South East.

mainly in Europe (excluding the UK;  $n=73$  studies, 16.1% of all studies), while 16 studies (3.5%) were conducted in the UK alone and 31 (6.8%) in the USA alone (Figure 3). The ethnicity of participants was explicitly mentioned in 207 (45.6%) studies.

The majority of studies ( $n=412$ ; 90.7%) recruited both male and female participants; 14 (3.1%) recruited only males, 21 (4.6%) only females, 5 (1.1%) did not record participants' gender and 2 (0.4%) recorded a separate category for gender as 'other'. Studies that recruited only females concerned oligomenorrhoea and amenorrhoea in women with polycystic ovary syndrome (PCOS), hirsutism in PCOS, acne, striae distensae, systemic lupus erythematosus with permanent facial skin damage, axillary hyperhidrosis (three studies), plaque psoriasis, rosacea, breast cancer (three studies), xerosis in dialysis patients, hand-foot syndrome, vulvovaginal candidiasis, alopecia, cellulite, hyperpigmentation, periorbital pigmentation and melasma. Studies that recruited only males concerned hyperpigmented lips, plaque psoriasis (five studies), psoriatic arthritis, chronic skin lesions due to mustard gas (three studies), actinic keratosis, hidradenitis suppurativa and lichen sclerosus (two studies). The mean age of the participants (where given) of all study arms across all studies was 45 (range 22–81) years.

### Disease profile

Sixty-eight different diseases were studied (Table 2).<sup>26–479</sup> Most studies were of psoriasis ( $n=251$ ; 55.3%), followed by atopic dermatitis ( $n=26$ ; 5.7%), urticaria ( $n=20$ ; 4.4%), psoriatic arthritis ( $n=17$ , 3.7%), eczema/hand eczema ( $n=16$ ; 3.5%) and hidradenitis suppurativa ( $n=11$ ; 2.4%).

Overall, studies recruited patients with mild ( $n=77/757$ ; 10.2%), moderate ( $n=288/757$ ; 38.0%) and severe ( $n=258/757$ ; 34.1%) disease, with 134/757 (17.7%) having unspecified disease severity. Psoriasis studies recruited patients with mild ( $n=46/453$ ; 10.2%), moderate ( $n=202/453$ ; 44.6%) and severe ( $n=183/453$ ; 40.4%); 22 (4.9%) patients had unspecified disease severity.

**Table 2** Diseases (*n*=69) studied in 454 studies included in this systematic review

| Disease type                                           | Disease                                  | No. of studies (%)                     | Reference(s) |         |
|--------------------------------------------------------|------------------------------------------|----------------------------------------|--------------|---------|
| Inflammatory                                           | Psoriasis                                | 251 (55.3)                             | 26–276       |         |
|                                                        | AD                                       | 26 (5.7)                               | 277–302      |         |
|                                                        | Urticaria                                | 20 (4.4)                               | 303–322      |         |
|                                                        | Eczema/hand eczema                       | 16 (3.5)                               | 203,323–338  |         |
|                                                        | PsA                                      | 17 (3.7)                               | 339–355      |         |
|                                                        | HS                                       | 11 (2.4)                               | 356–365,479  |         |
|                                                        | Acne                                     | 10 (2.2)                               | 366–375      |         |
|                                                        | Rosacea                                  | 7 (1.5)                                | 376–382      |         |
|                                                        | Palmoplantar pustulosis                  | 4 (0.9)                                | 383–386      |         |
|                                                        | Nail psoriasis                           | 3 (0.7)                                | 53,214,215   |         |
|                                                        | Palmoplantar psoriasis                   | 3 (0.7)                                | 50,52,104    |         |
|                                                        | Perioral dermatitis                      | 2 (0.4)                                | 387,388      |         |
|                                                        | Psoriasis and PsA                        | 2 (0.4)                                | 94,117       |         |
|                                                        | Seborrhoeic dermatitis                   | 2 (0.4)                                | 389,390      |         |
|                                                        | Bullous disease                          | 1 (0.2)                                | 391          |         |
|                                                        | HS and psoriasis                         | 1 (0.2)                                | 115          |         |
|                                                        | Lichen planus                            | 1 (0.2)                                | 392          |         |
|                                                        | Lupus erythematosus                      | 1 (0.2)                                | 393          |         |
|                                                        | PV                                       | 1 (0.2)                                | 394          |         |
|                                                        | Psoriasis and AD                         | 1 (0.2)                                | 61           |         |
|                                                        | Sarcoidosis                              | 1 (0.2)                                | 395          |         |
|                                                        | Scleroderma skin fibrosis                | 1 (0.2)                                | 396          |         |
|                                                        | Skin disorders caused by external agents | AK                                     | 4 (0.9)      | 397–400 |
| Radiodermatitis                                        |                                          | 3 (0.4)                                | 401–403      |         |
| Chemotherapy-induced cutaneous symptoms                |                                          | 2 (0.4)                                | 404,405      |         |
| Chronic actinic dermatitis and PLE                     |                                          | 1 (0.2)                                | 406          |         |
| Chronic sulfur mustard-induced cutaneous complications |                                          | 1 (0.2)                                | 407          |         |
| Contact dermatitis                                     |                                          | 1 (0.2)                                | 408          |         |
| Disseminated superficial actinic porokeratosis         |                                          | 1 (0.2)                                | 409          |         |
| Erlotinib-induced rash                                 |                                          | 1 (0.2)                                | 410          |         |
| Parthenium dermatitis                                  |                                          | 1 (0.2)                                | 411          |         |
| Photoaging                                             |                                          | 1 (0.2)                                | 412          |         |
| PLE                                                    |                                          | 1 (0.2)                                | 413          |         |
| Scalp psoriasis                                        |                                          | 1 (0.2)                                | 45           |         |
| Schnitzler syndrome                                    |                                          | 1 (0.2)                                | 414          |         |
| Benign and malignant tumours                           |                                          | Cutaneous leiomyomas                   | 1 (0.2)      | 415     |
|                                                        |                                          | Metastatic adenocarcinoma of the colon | 1 (0.2)      | 416     |
|                                                        | Metastatic colorectal cancer             | 1 (0.2)                                | 417          |         |
|                                                        | Oesophageal cancer                       | 1 (0.2)                                | 418          |         |
|                                                        | Skin care in breast cancer               | 1 (0.2)                                | 419          |         |
|                                                        | Infections and infestations              | Viral warts                            | 3 (0.7)      | 420–422 |
| Hand/foot syndrome                                     |                                          | 1 (0.2)                                | 423          |         |
| Herpes zoster                                          |                                          | 1 (0.2)                                | 424          |         |
| Leprosy                                                |                                          | 1 (0.2)                                | 425          |         |
| Tinea cruris/corporis                                  |                                          | 1 (0.2)                                | 426          |         |
| Tinea pedis                                            |                                          | 1 (0.2)                                | 427          |         |
| Vaginal candidiasis                                    |                                          | 1 (0.2)                                | 428          |         |
| Other                                                  |                                          | Pruritus                               | 10 (2.2)     | 429–438 |
|                                                        | Hyperhidrosis                            | 8 (1.7)                                | 439–446      |         |
|                                                        | Lichen sclerosus                         | 3 (0.6)                                | 447–449      |         |
|                                                        | Alopecia                                 | 2 (0.4)                                | 450,451      |         |
|                                                        | Cellulitis                               | 2 (0.4)                                | 452,453      |         |
|                                                        | Hirsutism in PCOS                        | 2 (0.4)                                | 454,455      |         |
|                                                        | Hyperpigmentation                        | 2 (0.4)                                | 456,457      |         |
|                                                        | Uraemic pruritus                         | 2 (0.4)                                | 458,459      |         |
|                                                        | Vitiligo                                 | 2 (0.4)                                | 460,461      |         |
|                                                        | Xerosis                                  | 2 (0.4)                                | 462,463      |         |
|                                                        | Dry skin                                 | 1 (0.2)                                | 464          |         |
|                                                        | Erythrokeratoderma                       | 1 (0.2)                                | 465          |         |
|                                                        | Leg ulcers                               | 1 (0.2)                                | 466          |         |
|                                                        | Lymphoedema due to podoconiosis          | 1 (0.2)                                | 467          |         |
|                                                        | Melasma                                  | 1 (0.2)                                | 468          |         |
|                                                        | Oligomenorrhoea and amenorrhoea          | 1 (0.2)                                | 469          |         |
|                                                        | Palmar hyperhidrosis                     | 1 (0.2)                                | 470          |         |
|                                                        | Periorbital pigmentation                 | 1 (0.2)                                | 471          |         |
|                                                        | Prurigo nodularis (nonatopic)            | 1 (0.2)                                | 472          |         |
|                                                        | Pyoderma gangrenosum                     | 1 (0.2)                                | 473          |         |
|                                                        | Stasis dermatitis                        | 1 (0.2)                                | 474          |         |
|                                                        | Striae distensae                         | 1 (0.2)                                | 475          |         |
|                                                        | 'Any skin disease'                       | 3 (0.7)                                | 476–478      |         |

Some studies are mentioned more than once as they may have covered more than one disease. AD, atopic dermatitis; AK, actinic keratosis; HS, hidradenitis suppurativa; PCOS, polycystic ovarian syndrome; PLE, polymorphous light eruption; PsA, psoriatic arthritis; PV, pemphigus vulgaris.



## Clinical severity and patient-reported outcomes assessment

Clinical severity assessment tools used included a mixture of dermatology-specific and generic measures. Psoriasis Area and Severity Index (PASI) was employed in 227 (50.0%) studies,<sup>480</sup> along with the Physicians' Global Assessment in 101 (22.2%),<sup>481</sup> Investigator Global Assessment in 53 (11.7%),<sup>482</sup> Nail Psoriasis Severity Index in 26 (5.7%),<sup>483</sup> Eczema Area and Severity Index in 20 (4.4%),<sup>484</sup> body surface area affected in 19 (4.2%),<sup>485</sup> and the SCORing Atopic Dermatitis (SCORAD) in 16 (3.5%). The PRO/QoL tools employed included the Medical Outcomes Study 36-item Short-Form health survey in 54 (11.9%),<sup>486</sup> the Hospital Anxiety and Depression Scale in 21 (4.6%),<sup>487</sup> and the EuroQoL EQ-5D-5L in 17 (3.7%).<sup>488</sup> Many other clinical severity assessment and PRO/QoL tools were also used (Table S3; see Supporting Information).

## Interventions using the Dermatology Life Quality Index in randomized clinical trials

Summary data – including disease; systemic, topical and nonmedicinal interventions; total number of participants randomized; mean or median age for each intervention arm; DLQI assessment period; clinical setting; most commonly used QoL tools; country of study; and Jadad score and domains from every included study – are provided in Table S4 (see Supporting Information).

Most study drugs were systemic ( $n=452/529$ ; 85.4%), with biologics (growth factors, immunomodulators, monoclonal antibodies, and products derived from human blood and plasma) comprising 253/529 (47.8%) of all pharmacological interventions. Topical treatments used in 76 studies comprised 17.0% of the total pharmacological interventions (Table 3).

Thirty-two different biologics were used in the studies, the most common being etanercept, ustekinumab, adalimumab, secukinumab and ixekizumab for psoriasis and psoriatic arthritis (Table 4).

The dominant nonpharmacological interventions ( $n=62$ ) were laser treatment ( $n=10/62$ ; 16.1% of the total nonpharmacological interventions), followed by ultraviolet radiation (UVR) treatments ( $n=6$ ; 9.7%), educational intervention ( $n=5$ ; 8.1%), Chinese (traditional) herbal medicines ( $n=4$ ; 6.5%), digital applications ( $n=3$ ; 4.8%), low-energy diets ( $n=2$ ; 3.2%), microneedle ( $n=2$ ; 3.2%) and platelet-rich plasma ( $n=2$ ; 3.2%), with a further 28 nonpharmacological interventions used in single studies (45.2%). Nonpharmacological interventions comprised only 12.2% of the total number of interventions ( $n=591$ ).

## Dermatology Life Quality Index scores

The DLQI was reported as a primary endpoint in 24 (5.3%) studies. Primary outcomes focused on clinical determinations of disease severity and progression, the most common being PASI. Generally, DLQI scores were reported as mean baseline and endpoint scores (from which we calculated differences), or as mean difference scores, or both. Mean DLQI baseline and endpoint scores were reported in arm 1 (control) in 26.0% of studies, arm 2 (intervention) in

27.5% of studies and arm 3 (intervention) in 11.0% of studies. Some studies reported only median scores.

Reported difference scores often differed from differences calculated from reported baseline and endpoint mean scores, having been calculated on a per-patient basis rather than as the difference of the group means. There was a trend to report differences when these were deemed significant; otherwise, baseline and endpoint scores were reported. Table 5 and Figure 4 give the DLQI score differences.<sup>489</sup>

Sixty-eight studies (15.0%) used MCID in their analysis, but only 6 (1.3%) considered full-score meaning banding of the DLQI scale.<sup>490</sup> Many studies also used the proportion of patients who achieved a final total DLQI score of 0 or 1 as an endpoint. In addition, 47 (10.4%) studies investigated statistical correlation of DLQI with other PRO/QoL tools.

## Study bias

Randomization was mentioned in 444 studies (97.8%); however, the method was only appropriate in 317 studies (69.8%). Blinding was mentioned without further detail in 77 studies (17.0%), 290 (63.9%) described appropriate blinding, 21 (4.6%) used an inappropriate blinding method, blinding was not mentioned in the methodology sections of 38 studies (8.4%) and in 25 studies (5.5%) the design made blinding irrelevant. Baseline data demographics were described across the study arms in 418 studies (92.1%); adjustments were made during analysis for baseline imbalances in three (0.7%) and were not mentioned in 27 studies (5.9%). Figure 5 shows the distribution of Jadad scores and summarizes the risk of bias.

In 84 (18.5%) studies, the authors stated that they followed an intention-to-treat protocol. Imputation for missing DLQI data was used in 156 (34.4%) studies. Several imputation methods were used, including fixed imputation (last observation carried forward) ( $n=76$ ; 16.7%), nonresponder imputation ( $n=47$ ; 10.4%) and multiple imputation ( $n=19$ ; 4.2%). Eighty-three studies (18.3%) used no imputation and the method was not stated in 151 (33.3%).

## Discussion

This systematic review represents 27 years of the global implementation of the DLQI in RCTs, compiling a wealth of information in a one-stop resource. The global reach of the DLQI is demonstrated by its use in 43 different countries and by 40.2% of studies using it in multiple countries. Furthermore, 41.2% of studies were conducted at > 10 sites; only 33.9% were conducted at a single site.

The number of studies that assessed systemic drugs ( $n=307/454$ ; 67.6%) is a result of the large number of new biologics ( $n=307/529$ ; 58.0% of total drugs assessed) being developed, mainly for the treatment of psoriasis, psoriatic arthritis, atopic dermatitis, urticaria and hidradenitis suppurativa. Topical treatments only comprised 17.6% ( $n=93$  studies) of the pharmacological interventions studied. A recent systematic review has confirmed that biologics can significantly improve DLQI scores in patients with psoriasis.<sup>9</sup> However, 69 different diseases were studied, emphasizing the generic strengths of the DLQI as a dermatology-specific

**Table 3** Pharmacological interventions (*n*=529) by drug type in 454 randomized controlled trials included in the systematic review

| Systemic intervention                         |                              |                                                                       | Topical intervention                 |                              |                                                                                                 |
|-----------------------------------------------|------------------------------|-----------------------------------------------------------------------|--------------------------------------|------------------------------|-------------------------------------------------------------------------------------------------|
|                                               | No. of uses (%) <sup>a</sup> | Reference(s)                                                          |                                      | No. of uses (%) <sup>a</sup> | Reference(s)                                                                                    |
| Biologics                                     | 253 (55.7)                   | See Table 4                                                           |                                      |                              |                                                                                                 |
| Analgesics                                    | 4 (0.8)                      | 424,430,458,459                                                       |                                      |                              |                                                                                                 |
| Antidiabetics                                 | 4 (0.8)                      | 79,93,136,150                                                         |                                      |                              |                                                                                                 |
| Antihistamine                                 | 11 (2.1)                     | 305,309,311,312,315,316,320,321,458                                   |                                      |                              |                                                                                                 |
| Antiviral (valaciclovir)                      | 1 (0.2)                      | 424                                                                   |                                      |                              |                                                                                                 |
| DMARD                                         | 2 (0.4)                      | 252,350                                                               |                                      |                              |                                                                                                 |
| Fusion toxin (DAB389IL-2)                     | 1 (0.2)                      | 43                                                                    |                                      |                              |                                                                                                 |
| Muscarinic agonist (pilocarpine)              | 1 (0.2)                      | 443                                                                   |                                      |                              |                                                                                                 |
| Selective NK1R antagonist (serlopitant)       | 1 (0.2)                      | 438                                                                   |                                      |                              |                                                                                                 |
| PDE4 inhibitor (apremilast)                   | 8 (1.5)                      | 50, 134,183,201,202,276,362                                           |                                      |                              |                                                                                                 |
| Antidepressant                                | 2 (0.4)                      | 430,459                                                               | Antidepressant (doxepin)             | 1 (0.2)                      | 433                                                                                             |
| Selective CRTh2 receptor antagonist (AZD1981) | 1 (0.2)                      | 322                                                                   | Antifungal                           | 6 (1.1)                      | 389,426–428                                                                                     |
| Anti-infectives                               | 5 (1.0)                      | 304,380,391,405,410                                                   | Anti-infectives                      | 9 (1.7)                      | 366,369,374,376,377,379,380,382,388                                                             |
| Antimuscarinic agent (methantheline bromide)  | 1 (0.2)                      | 442                                                                   | Antimuscarinic agent (oxybutynin)    | 1 (0.2)                      | 443                                                                                             |
| Corticosteroid (prednisolone)                 | 3 (0.6)                      | 333,391,473                                                           | Corticosteroid                       | 27 (5.1)                     | 68,95,119,121,144–146, 163,185,188,235,242,324,329,331, 334,338,403,407,416,429,433,435,472,474 |
| EGFR TKi (icotinib)                           | 1 (0.2)                      | 396                                                                   | EGFR TKi (icotinib)                  | 1 (0.2)                      | 272                                                                                             |
|                                               |                              |                                                                       | Humectant (hyaluronic acid)          | 1 (0.2)                      | 400                                                                                             |
| Immunosuppressants                            | 20 (3.8)                     | 39,48,66,88,113,134–136, 186,199,217,221,260,268,269,287, 333,394,473 | Immunosuppressants                   | 4 (0.8)                      | 387,390,437,472                                                                                 |
| JAKi                                          | 16 (3.0)                     | 26,41,51,63,86,110,155,178,251,296,2 99,302,347                       | JAKi (tofacitinib)                   | 1 (0.2)                      | 176                                                                                             |
| Muscarinic antagonist (oxybutynin)            | 1 (0.2)                      | 443                                                                   | Muscarinic antagonist (oxybutynin)   | 1 (0.2)                      | 446                                                                                             |
| Natural products and supplements              | 7 (1.3)                      | 221,271,282,348,375,424,434                                           | Natural products and supplements     | 4 (0.8)                      | 151,398,404,451                                                                                 |
| NSAID                                         | 6 (1.1)                      | 190,199,229,240,241                                                   | NSAID                                | 2 (0.4)                      | 248,400                                                                                         |
| Retinoids                                     | 9 (1.7)                      | 150,225,271,368,373,399,412,449                                       | Retinoids                            | 3 (0.6)                      | 95,235,412                                                                                      |
| Statins                                       | 4 (0.8)                      | 28,69,121,466                                                         | Statins (atorvastatin)               | 1 (0.2)                      | 331                                                                                             |
| Tyrosine kinase 2 inhibitors                  | 2 (0.4)                      | 236,410                                                               | TRPM8 agonists (menthoxypropanediol) | 1 (0.2)                      | 436                                                                                             |
| Vitamin D3/vitamin D derivatives              | 3 (0.6)                      | 119,120,411                                                           | Vitamin D3/vitamin D derivatives     | 9 (1.7)                      | 144,145,150,185,188,189,263,351                                                                 |
| Others                                        | 7 (1.3)                      | 357,415,421,441,445                                                   | Others                               | 5 (1.0)                      | 242,367,457,465,470                                                                             |

CRTh2, prostaglandin D2 receptor 2; DMARD, disease-modifying antirheumatic drug; EGFR, epidermal growth factor receptor; JAKi, Janus kinase inhibitor; NK1R, neurokinin 1 receptor; NSAID, nonsteroidal anti-inflammatory drug; PDE4, phosphodiesterase-4; TKi, tyrosine kinase inhibitor; TRPM8, transient receptor potential cation channel subfamily M member 8. <sup>a</sup>Number of uses refers to the number of studies that used a particular drug of that type. Some studies used multiple drugs of that type (e.g. both bilastine and levocetirizine as antihistamines in the same study), so the number of references may not match the number of uses.

instrument and a broader interest within the research community.

Nonpharmacological interventions (*n*=62; 10.5% of total interventions) were mainly laser therapy (*n*=10; 16.1%) and UVR treatment (*n*=6; 9.7%), as well as various nonpharmacological interventions used in single studies (45.2% of nonpharmacological interventions). The low number of traditional medicine interventions may be due to the required complexity of clinical trials; novel laser or UVR treatments have commercialization potential, whereas widely used traditional medicines cannot receive patent protection.

The results showed that 26.0%, 27.5% and 11.0% of studies reported DLQI score differences for arms 1, 2 and 3, respectively. In addition, in 57.9%, 63.2% and 24.4% of studies of arms 1, 2 and 3, respectively, a score difference could be calculated from provided baseline and end-of-study

DLQI scores. Furthermore, 61–86% of studies in the 'active arms' had within-group score differences greater than the MCID,<sup>489</sup> representing differences for the control/placebo arm of >33%. Such a result might be expected as studies usually included only more severely affected patients (most often in psoriasis, screened using the PASI).

Risk of bias was generally low; 91.8% of studies had Jadad scores of  $\geq 3$ , 0.4% of studies showed a high risk from randomization, only 13.4% had a high risk of bias from blinding and 10.1% had a high risk due to the unknown fate of all participants. Although it might be expected that older studies had more potential for bias, this review showed no correlation between publication date and Jadad score (Spearman rank  $r^2=0.028$ ). Allocation concealment,<sup>491</sup> although now considered an important element in study bias, was barely mentioned. Most studies (92.1%) checked

**Table 4** Interventions (*n*=529) using biologics in 454 randomized controlled trials included in the systematic review

| Biologic                       | No. of uses (% of total pharmacological interventions) | Disease(s) studied                                          | Reference(s)                                                                                                                                               |
|--------------------------------|--------------------------------------------------------|-------------------------------------------------------------|------------------------------------------------------------------------------------------------------------------------------------------------------------|
| Etanercept                     | 42 (7.9)                                               | HS, pruritus, psoriasis                                     | 27,41,46,71,74,83,91,94,98,108,109,112,114,117,124,130-132,141,152,154,160,162,168,175,182,184,195,201,202,208,213,226,232,238,247,251,255,267,269,356,432 |
| Ustekinumab                    | 37 (7.0)                                               | AD, psoriasis                                               | 39,40,42,44,52,55,58,59,70,92,102,111,114,118,127,130,131,137-140,143,156,167,177,186,194,196,209,212,237,245,246,259,275,291,343,352                      |
| Adalimumab                     | 36 (6.8)                                               | Cutaneous sarcoidosis, HS, psoriasis, PsA                   | 32,33,56,64,70,85,107,126,128,149,157,164,169,179,182,186,191-193,197,198,200,203,204,217,218,227,257,340,341,347,351,360,365,395,479                      |
| Secukinumab                    | 31 (5.9)                                               | PPP, psoriasis, PsA                                         | 27,30,38,42,44,58,59,74,80,92,103,104,114,117,129-131,165,171,194,205,210,215,229,232,237,256,349,354,383                                                  |
| Ixekizumab                     | 23 (4.4)                                               | Psoriasis, PsA                                              | 30,53,55,97,108,112,124,141,147,148,184,195,196,199,207,209,220,261,266,267,274,341,342                                                                    |
| Guselkumab                     | 15 (2.8)                                               | PPP, psoriasis                                              | 32,56,107,140,149,170,197,198,200,203,204,240,384,386                                                                                                      |
| Brodalumab                     | 11 (2.1)                                               | Psoriasis                                                   | 99,137,138,156,166,174,177,190,224,254,259                                                                                                                 |
| Infliximab                     | 8 (1.5)                                                | Psoriasis                                                   | 48,77,81,82,206,243,244,262                                                                                                                                |
| Dupilumab                      | 6 (1.1)                                                | AD                                                          | 277,279,283,293,294,297                                                                                                                                    |
| Efalizumab                     | 4 (0.8)                                                | Psoriasis                                                   | 101,158,159,172                                                                                                                                            |
| Risankizumab                   | 4 (0.8)                                                | Psoriasis                                                   | 40,102,180,241                                                                                                                                             |
| Alefacept                      | 3 (0.6)                                                | Psoriasis                                                   | 75,84,87                                                                                                                                                   |
| Bimekizumab                    | 3 (0.6)                                                | HS, psoriasis                                               | 57,257,479                                                                                                                                                 |
| Omalizumab                     | 3 (0.6)                                                | Urticaria                                                   | 317-319                                                                                                                                                    |
| Tralokinumab                   | 3 (0.6)                                                | AD                                                          | 292,300,301                                                                                                                                                |
| Abatacept                      | 2 (0.4)                                                | PsA                                                         | 346,353                                                                                                                                                    |
| Brikinumab                     | 2 (0.4)                                                | Psoriasis                                                   | 100,181                                                                                                                                                    |
| Canakinumab                    | 2 (0.4)                                                | Schnitzler syndrome, urticaria                              | 314,414                                                                                                                                                    |
| CPZ                            | 2 (0.4)                                                | Psoriasis                                                   | 249,250                                                                                                                                                    |
| Cetuximab                      | 2 (0.4)                                                | Oesophageal cancer, radiodermatitis of head and neck cancer | 401,418                                                                                                                                                    |
| Lebrikizumab                   | 2 (0.4)                                                | AD                                                          | 284,295                                                                                                                                                    |
| Tildrakizumab                  | 2 (0.4)                                                | Psoriasis                                                   | 60,208                                                                                                                                                     |
| Bermekimab                     | 1 (0.2)                                                | HS                                                          | 358                                                                                                                                                        |
| Clazakizumab                   | 1 (0.2)                                                | PsA                                                         | 345                                                                                                                                                        |
| Cytokines (IL-4, IL-10, IL-11) | 1 (0.2)                                                | Psoriasis                                                   | 219                                                                                                                                                        |
| Golimumab                      | 1 (0.2)                                                | PsA                                                         | 344                                                                                                                                                        |
| IFN- $\gamma$                  | 1 (0.2)                                                | Chronic sulfur mustard-induced cutaneous complications      | 407                                                                                                                                                        |
| Itolizumab                     | 1 (0.2)                                                | Psoriasis                                                   | 133                                                                                                                                                        |
| Mirikizumab                    | 1 (0.2)                                                | Psoriasis                                                   | 211                                                                                                                                                        |
| Nemolizumab                    | 1 (0.2)                                                | AD                                                          | 290                                                                                                                                                        |
| Panitumumab                    | 1 (0.2)                                                | Metastatic colorectal cancer                                | 417                                                                                                                                                        |
| Rituximab                      | 1 (0.2)                                                | PV                                                          | 394                                                                                                                                                        |
| Total                          | 253 (90)                                               |                                                             |                                                                                                                                                            |

AD, atopic dermatitis; CPZ, certolizumab pegol; HS, hidradenitis suppurativa; IFN, interferon; IL, interleukin; PPP, palmoplantar pustulosis; PsA, psoriatic arthritis; PV, pemphigus vulgaris. AD, atopic dermatitis; CPZ, certolizumab pegol; HS, hidradenitis suppurativa; IFN, interferon; IL, interleukin; PPP, palmoplantar pustulosis; PsA, psoriatic arthritis; PV, pemphigus vulgaris.

**Table 5** Dermatology Life Quality Index (DLQI) score differences across 454 randomized controlled trials included in the systematic review

|                                                                   | Arm 1 difference <sup>a</sup> | Arm 2 difference <sup>a</sup> | Arm 3 difference <sup>a</sup> | Arm 1 calculated difference <sup>b</sup> | Arm 2 calculated difference <sup>b</sup> | Arm 3 calculated difference <sup>b</sup> |
|-------------------------------------------------------------------|-------------------------------|-------------------------------|-------------------------------|------------------------------------------|------------------------------------------|------------------------------------------|
| No. of studies with DLQI difference scores                        | 118                           | 125                           | 50                            | 263                                      | 287                                      | 111                                      |
| % studies with DLQI difference scores                             | 26.0                          | 27.5                          | 11.0                          | 57.9                                     | 63.2                                     | 24.4                                     |
| No. of studies with no data available                             | 336                           | 320                           | 404                           | 191                                      | 167                                      | 343                                      |
| No. of studies with score difference > MCID of 4.0 <sup>489</sup> | 33                            | 76                            | 31                            | 181                                      | 219                                      | 95                                       |
| No. of studies with score difference < MCID of 4.0 <sup>489</sup> | 84                            | 48                            | 17                            | 82                                       | 68                                       | 16                                       |
| % of studies with score difference > MCID of 4.0 <sup>489</sup>   | 28.2                          | 61.3                          | 64.6                          | 68.8                                     | 76.3                                     | 85.6                                     |

MCID, minimal clinically important difference. <sup>a</sup>Arm 1, arm 2 and arm 3 differences are published DLQI differences as reported. <sup>b</sup>Arm 1, arm 2 and arm 3 calculated differences were determined from differences between reported baseline and endpoint DLQI scores, where reported.



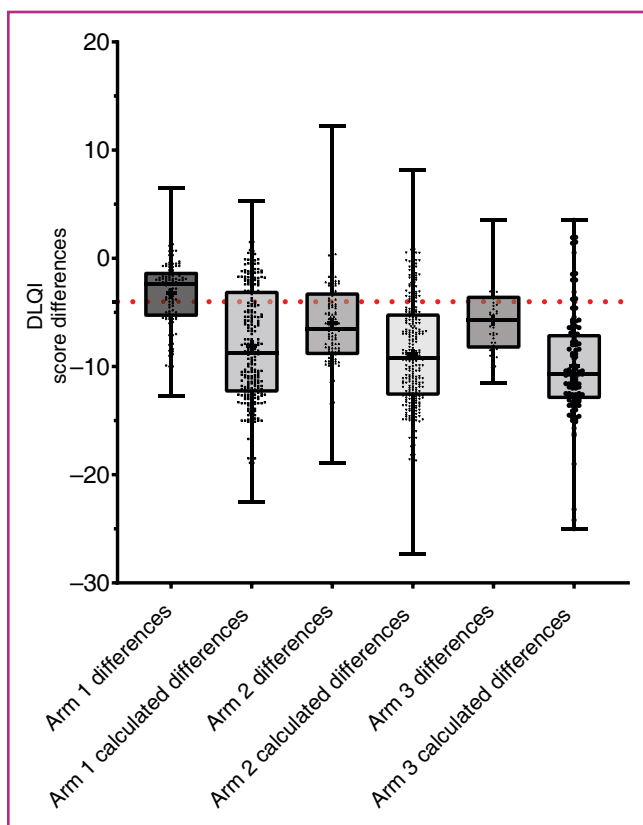

**Figure 4** Published and calculated Dermatology Life Quality Index (DLQI) score differences for all interventions ( $n=469$ ). Arm 1, arm 2 and arm 3 differences are published DLQI differences as reported. Arm 1, arm 2 and arm 3 calculated differences were determined from differences between reported baseline and endpoint DLQI scores, where reported. Arm 1 is generally a control, with arms 2 and 3 being increasing dosages of the same drug or greater potency of alternative treatments (i.e. expectedly increasingly more effective treatments). Whiskers show maximum and minimum values. Bars show means. Dotted horizontal line shows the DLQI minimal clinically important difference.

for baseline equivalence between study arms, although older studies often neglected to do so and few indicated any baseline correction being performed during analysis.

The assessment of bias was made at the level of an individual result, rather than at a study or outcome level.

The domains included in the risk-of-bias analysis were bias arising from the randomization process, bias due to blinding and bias due to not accounting for all patients in the trial. The appropriate reporting of baseline (i.e. imbalances in study arms) and whether any corrections were made in the analysis to account for baseline imbalance were also noted.

This systematic review had some limitations. Although only articles written in English were reviewed, they often reported on RCTs carried out using different translations of the DLQI. The reports generally amalgamated DLQI data and did not report score distribution for each language. It would be of interest to analyse the raw data, to identify possible interpretation differences.

We only examined studies with extractable DLQI data and did not capture all pharmacological interventions for complex studies involving multiple arms (>3), pretreatments, multiple phases, crossover studies and so on, and those that separately analysed multiple RCTs within the one study. However, all other data in our capture template for these studies were obtained. We did not capture all dosage regimens or administration routes, this being beyond the study's scope. Limited data were available to describe the study settings in most publications. Some studies published invalid data, for example scores greater than the maximum possible for the DLQI and these data were therefore not included.

Patients may respond 'not relevant' to DLQI questions for a variety of reasons. The exceptional circumstances of the COVID-19 pandemic may have resulted in greater use of this response, as the pandemic restricted many aspects of people's lives. However, considering the time from data collection to publication of a RCT, it is unlikely that any publications included in our study were based on trials conducted during the pandemic.

The DLQI has been widely used in dermatology clinical trials due to its robustness, simplicity and ease of use.<sup>3</sup> The DLQI developers constantly engage in enhancing the utility of the DLQI, and this review of its use in clinical trials is the most comprehensive to date. This review allows structured access to inform future users of the DLQI, confirms the extensive experience of the DLQI in RCTs in dermatology and demonstrates the utility of the DLQI as the PRO measure of choice over the last 20 years. The use of the DLQI as a primary outcome measure in 24 RCTs represents

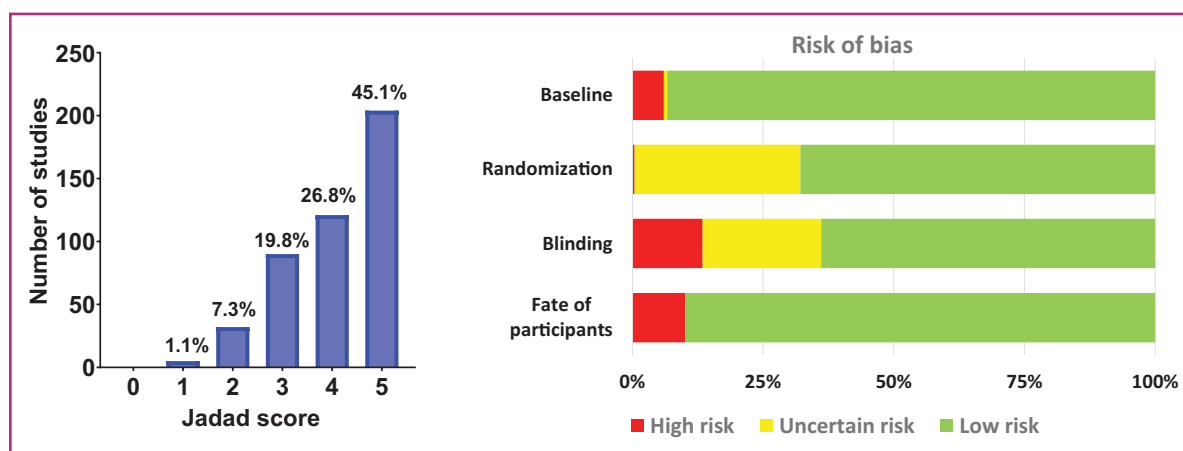

**Figure 5** Distribution of Jadad scores and risk of bias.

a paradigm shift in the status accorded to PROs in dermatology. Traditionally researchers used only sign/symptom severity measures as primary endpoints in RCT protocols. PROs were secondary endpoints, despite more extensive validation. The use of the DLQI as a primary endpoint, with PROs' precision similar to those of clinical/biomedical parameters, indicates growing confidence in giving PROs such status to be used for labelling in marketing authorization of new health technologies, as well as an aid to treatment decision-making.

Although the majority of RCTs included in this study reported data in appropriate detail, some publications had deficiencies, particularly reporting DLQI data. The following recommendations are made: (i) publications reporting clinicals trials should include details of study settings, gender, ethnicity, and mean and range participant age; (ii) sample size calculation, randomization and blinding methods, including allocation concealment, should be clearly stated, and correct baseline characteristics and comparisons of patients presented; (iii) patient numbers should be reported, whether an intention-to-treat or per-protocol analysis was implemented, and the method(s) used for the imputation of missing data; (iv) DLQI baseline and final data collection point mean and median scores with interquartile range, as well as score differences, should be published, even when the DLQI outcome may be the percentage of 0 or 1 scores at the final data collection point – the presentation of percentage score changes should be discouraged; (v) authors should analyse their DLQI data using MCID and use score severity bands to interpret results.

### Funding sources

Funding was provided by the Division of Infection and Immunity, School of Medicine, Cardiff University, Cardiff, UK.

### Conflicts of interest

J.V. has participated in an Advisory Board for Amgen, has received payment or honoraria from L'Oréal and support from UCB Pharma for attending meetings. F.M.A. has received honoraria from AbbVie, Janssen, LEO Pharma, Lilly Pharmaceuticals, L'Oréal, Novartis and UCB. His department receives income from royalties from the Dermatology Life Quality Index (DLQI) and related instruments. J.R.I. receives a stipend as Editor-in-Chief of the *British Journal of Dermatology* and an authorship honorarium from UpToDate. He is a consultant for Boehringer Ingelheim, ChemoCentryx, Citryll, Novartis and UCB Pharma, and has served on advisory boards for Insmad, Kymera Therapeutics and Viela Bio. He is co-copyright holder of HiSQOL, Investigator Global Assessment and Patient Global Assessment instruments for hidradenitis suppurativa. His department receives income from royalties from the DLQI and related instruments. S.S. has received an unrestricted educational grant from GSK, is a consultant for Novo Nordisk and produces educational materials for AbbVie. A.Y.F. is joint copyright owner of the DLQI. Cardiff University receives royalties from some use of the DLQI; A.Y.F. receives a proportion of these under standard university policy.

J.R.J. and R.K.S. report no conflicts of interest.

### Data availability

All data are incorporated into the article and the [Supporting Information](#).

### Ethics statement

Not applicable.

### Supporting Information

Additional [Supporting Information](#) may be found in the online version of this article at the publisher's website.

### References

- 1 Basra MK, Fenech R, Gatt RM *et al.* The Dermatology Life Quality Index 1994–2007: a comprehensive review of validation data and clinical results. *Br J Dermatol* 2008; **159**:997–1035.
- 2 Chernyshov PV. The evolution of quality of life assessment and use in dermatology. *Dermatology* 2019; **235**:167–74.
- 3 Loo WJ, Diba V, Chawla M *et al.* Dermatology Life Quality Index: influence of an illustrated version. *Br J Dermatol* 2003; **148**:279–84.
- 4 Finlay AY, Basra MKA, Piguat V *et al.* Dermatology Life Quality Index (DLQI): a paradigm shift to patient-centered outcomes. *J Invest Dermatol* 2012; **132**:2464–5.
- 5 Finlay A, Singh R. DLQI guidelines, registries and reimbursement guidelines. Cardiff University, 2020. Available at: [https://www.cardiff.ac.uk/\\_\\_data/assets/pdf\\_file/0008/1744793/DLQI-guidelines-worldwide-Jan-2020.pdf](https://www.cardiff.ac.uk/__data/assets/pdf_file/0008/1744793/DLQI-guidelines-worldwide-Jan-2020.pdf) (last accessed 6 November 2023).
- 6 Ali FM, Cueva AC, Vyas J *et al.* A systematic review of the use of quality-of-life instruments in randomized controlled trials for psoriasis. *Br J Dermatol* 2017; **176**:577–93.
- 7 Mattei PL, Corey KC, Kimball AB. Psoriasis Area Severity Index (PASI) and the Dermatology Life Quality Index (DLQI): the correlation between disease severity and psychological burden in patients treated with biological therapies. *J Eur Acad Dermatol Venereol* 2014; **28**:333–7.
- 8 Bronsard V, Paul C, Prey S *et al.* What are the best outcome measures for assessing quality of life in plaque type psoriasis? A systematic review of the literature. *J Eur Acad Dermatol Venereol* 2010; **24**(Suppl. 2):17–22.
- 9 de Ruiter CC, Rustemeyer T. Biologics can significantly improve Dermatology Life Quality Index (DLQI) in psoriatic patients: a systematic review. *Psoriasis (Auckl)* 2022; **12**:99–112.
- 10 Katugampola RP, Lewis VJ, Finlay AY. The Dermatology Life Quality Index: assessing the efficacy of biological therapies for psoriasis. *Br J Dermatol* 2007; **156**:945–50.
- 11 Prado G, Nichols AJ, Florez-White M, Kerdel F. Reporting of quality of life in clinical trials of biologics for plaque psoriasis: a systematic review. *Skin J Cutan Med* 2018; **2**:273–301.
- 12 Rencz F, Szabo A, Brodsky V. Questionnaire modifications and alternative scoring methods of the Dermatology Life Quality Index: a systematic review. *Value Health* 2021; **24**:1158–71.
- 13 Lennox RD, Leahy MJ. Validation of the Dermatology Life Quality Index as an outcome measure for urticaria-related quality of life. *Ann Allergy Asthma Immunol* 2004; **93**:142–6.
- 14 Szabo A, Brodsky V, Rencz F. A comparative study on the measurement properties of Dermatology Life Quality Index (DLQI), DLQI-Relevant and Skindex-16. *Br J Dermatol* 2022; **186**:485–95.

- 15 Ali FM, Johns N, Salek S *et al.* Correlating the Dermatology Life Quality Index with psychiatric measures: a systematic review. *Clin Dermatol* 2018; **36**:691–7.
- 16 Page MJ, McKenzie JE, Bossuyt PM *et al.* The PRISMA 2020 statement: an updated guideline for reporting systematic reviews. *IHRev Esp Cardiol (Engl Ed)* 2021; **74**:790–9.
- 17 Schiavo JH. PROSPERO: an international register of systematic review protocols. *Med Ref Serv Q* 2019; **38**:171–80.
- 18 Peters MD. Managing and coding references for systematic reviews and scoping reviews in EndNote. *Med Ref Serv Q* 2017; **36**:19–31.
- 19 Higgins JPT, Thomas J, Chandler J *et al.* Cochrane Handbook for Systematic Reviews of Interventions. Version 6.3 (updated February 2022). Available at: [www.training.cochrane.org/handbook](http://www.training.cochrane.org/handbook) (last accessed 6 November 2023).
- 20 Harris PA, Taylor R, Thielke R *et al.* Research Electronic Data Capture (REDCap) – a metadata-driven methodology and workflow process for providing translational research informatics support. *J Biomed Inform* 2009; **42**:377–81.
- 21 Van Bulck L, Wampers M, Moons P. Research Electronic Data Capture (REDCap): tackling data collection, management, storage, and privacy challenges. *Eur J Cardiovasc Nurs* 2022; **21**:85–91.
- 22 Harris PA, Taylor R, Minor BL *et al.* The REDCap consortium: building an international community of software platform partners. *J Biomed Inform* 2019; **95**:103208.
- 23 Higgins JP, Green S, eds. *Cochrane Handbook for Systematic Reviews of Interventions*. Version 5.1.0. 2011. Available at: <http://handbook-5-1.cochrane.org/> (last accessed 6 November 2023).
- 24 Halpern SH, Douglas MJ. Appendix: Jadad scale for reporting randomized controlled trials. In: *Evidence-based Obstetric Anesthesia* (Halpern SH, Douglas MJ, eds). Malden, MA: Blackwell Publishing, 2005.
- 25 Jadad AR, Moore RA, Carroll D *et al.* Assessing the quality of reports of randomized clinical trials: is blinding necessary? *Control Clin Trials* 1996; **17**:1–12.
- 26 Abe M, Nishigori C, Torii H *et al.* Tofacitinib for the treatment of moderate to severe chronic plaque psoriasis in Japanese patients: subgroup analyses from a randomized, placebo-controlled phase 3 trial. *J Dermatol* 2017; **44**:1228–37.
- 27 Adsit S, Zaldivar ER, Sofen H *et al.* Secukinumab is efficacious and safe in Hispanic patients with moderate-to-severe plaque psoriasis: pooled analysis of four phase 3 trials. *Adv Ther* 2017; **34**:1327–39.
- 28 Al Salman M, Ghiasi M, Azizpour A *et al.* Oral simvastatin combined with narrowband UVB for the treatment of psoriasis: a randomized controlled trial. *Dermatol Ther (Heidelb)* 2021; **34**:e15075.
- 29 Ali NM, Chan LC, Akhir NSNM *et al.* Effectiveness of color and picture labeling in improving the knowledge on topical medications among patients with psoriasis: a randomized controlled trial. *J Pharm Bioallied Sci* 2020; **12**:201–9.
- 30 AlMutairi N, Eassa BI. Comparing the efficacy and safety of IL-17 inhibitors for treatment of moderate-to-severe psoriasis: a randomized double blind pilot study with a review of literature. *Postepy Dermatolog Alergol* 2021; **38**:281–8.
- 31 Armstrong AW, Ford AR, Chambers CJ *et al.* Online care versus in-person care for improving quality of life in psoriasis: a randomized controlled equivalency trial. *J Invest Dermatol* 2019; **139**:1037–44.
- 32 Armstrong AW, Reich K, Foley P *et al.* Improvement in patient-reported outcomes (Dermatology Life Quality Index and the Psoriasis Symptoms and Signs Diary) with guselkumab in moderate-to-severe plaque psoriasis: results from the phase III VOYAGE 1 and VOYAGE 2 studies. *Am J Clin Dermatol* 2019; **20**:155–64.
- 33 Armstrong AW, Villanueva Quintero DG, Echeverria CM *et al.* Body region involvement and quality of life in psoriasis: analysis of a randomized controlled trial of adalimumab. *Am J Clin Dermatol* 2016; **17**:691–9.
- 34 Atalay S, van den Reek JMPA, den Broeder AA *et al.* Comparison of tightly controlled dose reduction of biologics with usual care for patients with psoriasis: a randomized clinical trial. *JAMA Dermatol* 2020; **156**:393–400.
- 35 Atalay S, van den Reek JMPA, Otero ME *et al.* Health economic consequences of a tightly controlled dose reduction strategy for adalimumab, etanercept and ustekinumab compared with standard psoriasis care: a cost–utility analysis of the Condor study. *Acta Derm Venereol* 2020; **100**:1–7.
- 36 Atalay S, van den Reek JMPA, van de Kerkhof PCM *et al.* Two-year follow-up of a dose reduction strategy trial of biologics adalimumab, etanercept, and ustekinumab in psoriasis patients in daily practice. *J Dermatolog Treat* 2022; **33**:1591–7.
- 37 Atyabi A, Kordafshari G, Nejatbakhsh F *et al.* Evaluation of the role of whey with dodder oxymel on mild to moderate psoriasis: a double-blind, randomized controlled trial. *Biomed Res Ther* 2018; **5**:2620–32.
- 38 Augustin M, Abeysinghe S, Mallya U *et al.* Secukinumab treatment of plaque psoriasis shows early improvement in DLQI response – results of a phase II regimen-finding trial. *J Eur Acad Dermatol Venereol* 2016; **30**:645–9.
- 39 Augustin M, Blome C, Paul C *et al.* Quality of life and patient benefit following transition from methotrexate to ustekinumab in psoriasis. *J Eur Acad Dermatol Venereol* 2017; **31**:294–303.
- 40 Augustin M, Lambert J, Zema C *et al.* Effect of risankizumab on patient-reported outcomes in moderate to severe psoriasis: the UltIMMa-1 and UltIMMa-2 randomized clinical trials. *JAMA Dermatol* 2020; **156**:1344–53.
- 41 Bachelez H, van de Kerkhof PCM, Strohal R *et al.* Tofacitinib versus etanercept or placebo in moderate-to-severe chronic plaque psoriasis: a phase 3 randomised non-inferiority trial. *Lancet* 2015; **386**:552–61.
- 42 Bagel J, Blauvelt A, Nia J *et al.* Secukinumab maintains superiority over ustekinumab in clearing skin and improving quality of life in patients with moderate to severe plaque psoriasis: 52-week results from a double-blind phase 3b trial (CLARITY). *J Eur Acad Dermatol Venereol* 2021; **35**:135–42.
- 43 Bagel J, Garland WT, Breneman D *et al.* Administration of DAB389IL-2 to patients with recalcitrant psoriasis: a double-blind, phase II multicenter trial. *J Am Acad Dermatol* 1998; **38**:938–44.
- 44 Bagel J, Nia J, Hashim PW *et al.* Secukinumab is superior to ustekinumab in clearing skin in patients with moderate to severe plaque psoriasis (16-week CLARITY results). *Dermatol Ther (Heidelb)* 2018; **8**:571–9.
- 45 Bahraini P, Rajabi M, Mansouri P *et al.* Turmeric tonic as a treatment in scalp psoriasis: a randomized placebo-control clinical trial. *J Cosmet Dermatol* 2018; **17**:461–6.
- 46 Balak DMW, Van Doorn MBA, Prens EP *et al.* Combination therapy of etanercept and fumarates versus etanercept monotherapy in psoriasis: a randomized exploratory study. *Dermatology* 2016; **232**:407–14.
- 47 Balato N, Megna M, Di Costanzo L *et al.* Educational and motivational support service: a pilot study for mobile-phone-based interventions in patients with psoriasis. *Br J Dermatol* 2013; **168**:201–5.
- 48 Barker J, Hoffmann M, Wozel G *et al.* Efficacy and safety of infliximab vs. methotrexate in patients with moderate-to-severe plaque psoriasis: results of an open-label, active-controlled, randomized trial (RESTORE1). *Br J Dermatol* 2011; **165**:1109–17.
- 49 Bergstrom KG, Arambula K, Kimball AB. Medication formulation affects quality of life: a randomized single-blind study of

- clobetasol propionate foam 0.05% compared with a combined program of clobetasol cream 0.05% and solution 0.05% for the treatment of psoriasis. *Cutis* 2003; **72**:407–11.
- 50 Bissonnette R, Haydey R, Rosoph LA *et al.* Apremilast for the treatment of moderate-to-severe palmoplantar psoriasis: results from a double-blind, placebo-controlled, randomized study. *J Eur Acad Dermatol Venereol* 2018; **32**:403–10.
- 51 Bissonnette R, Iversen L, Sofen H *et al.* Tofacitinib withdrawal and retreatment in moderate-to-severe chronic plaque psoriasis: a randomized controlled trial. *Br J Dermatol* 2015; **172**:1395–406.
- 52 Bissonnette R, Nigen S, Langley RG *et al.* Increased expression of IL-17A and limited involvement of IL-23 in patients with palmoplantar (PP) pustular psoriasis or PP pustulosis; results from a randomized controlled trial. *J Eur Acad Dermatol Venereol* 2014; **28**:1298–305.
- 53 Blauvelt A, Leonardi C, Elewski B *et al.* A head-to-head comparison of ixekizumab vs. guselkumab in patients with moderate-to-severe plaque psoriasis: 24-week efficacy and safety results from a randomized, double-blinded trial. *Br J Dermatol* 2021; **184**:1047–58.
- 54 Blauvelt A, Leonardi CL, Gaylis N *et al.* Treatment with SDZ-ADL, an adalimumab biosimilar, in patients with rheumatoid arthritis, psoriasis, or psoriatic arthritis: results of patient-reported outcome measures from two phase III studies (ADMYRA and ADACCESS). *BioDrugs* 2021; **35**:229–38.
- 55 Blauvelt A, Lomaga M, Burge R *et al.* Greater cumulative benefits from ixekizumab versus ustekinumab treatment over 52 weeks for patients with moderate-to-severe psoriasis in a randomized, double-blinded phase 3b clinical trial. *J Dermatolog Treat* 2020; **31**:141–6.
- 56 Blauvelt A, Papp KA, Griffiths CEM *et al.* Efficacy and safety of guselkumab, an anti-interleukin-23 monoclonal antibody, compared with adalimumab for the continuous treatment of patients with moderate to severe psoriasis: results from the phase III, double-blinded, placebo- and active comparator-controlled VOYAGE 1 trial. *J Am Acad Dermatol* 2017; **76**:405–17.
- 57 Blauvelt A, Papp KA, Merola JF *et al.* Bimekizumab for patients with moderate to severe plaque psoriasis: 60-week results from BE ABLE 2, a randomized, double-blinded, placebo-controlled, phase 2b extension study. *J Am Acad Dermatol* 2020; **83**:1367–74.
- 58 Blauvelt A, Reich K, Mehlis S *et al.* Secukinumab demonstrates greater sustained improvements in daily activities and personal relationships than ustekinumab in patients with moderate-to-severe plaque psoriasis: 52-week results from the CLEAR study. *J Eur Acad Dermatol Venereol* 2017; **31**:1693–9.
- 59 Blauvelt A, Reich K, Tsai T-F *et al.* Secukinumab is superior to ustekinumab in clearing skin of subjects with moderate-to-severe plaque psoriasis up to 1 year: results from the CLEAR study. *J Am Acad Dermatol* 2017; **76**:60–9.
- 60 Blauvelt A, Sofen H, Papp K *et al.* Tildrakizumab efficacy and impact on quality of life up to 52 weeks in patients with moderate-to-severe psoriasis: a pooled analysis of two randomized controlled trials. *J Eur Acad Dermatol Venereol* 2019; **33**:2305–12.
- 61 Bostoen J, Bracke S, De Keyser S *et al.* An educational programme for patients with psoriasis and atopic dermatitis: a prospective randomized controlled trial. *Br J Dermatol* 2012; **167**:1025–31.
- 62 Bundy C, Pinder B, Bucci S *et al.* A novel, web-based, psychological intervention for people with psoriasis: the electronic Targeted Intervention for Psoriasis (eTIPs) Study. *Br J Dermatol* 2013; **169**:329–36.
- 63 Bushmakina AG, Mamolo C, Cappelleri JC *et al.* The relationship between pruritus and the clinical signs of psoriasis in patients receiving tofacitinib. *J Dermatolog Treat* 2015; **26**:19–22.
- 64 Cai L, Zhang JZ, Gu J *et al.* Efficacy and safety of adalimumab in Chinese patients with moderate-to-severe plaque psoriasis: results from a phase 3, randomized, placebo-controlled, double-blind study. *J Eur Acad Dermatol Venereol* 2017; **31**:89–95.
- 65 Caldarola G, De Simone C, Moretta G *et al.* Role of personalized medication training in improving efficacy and adherence to a topical therapy in psoriatic patients. *J Dermatolog Treat* 2017; **28**:722–5.
- 66 Chaidemenos GC, Mourellou O, Avgoustinaki N *et al.* Intermittent vs. continuous 1-year cyclosporin use in chronic plaque psoriasis. *J Eur Acad Dermatol Venereol* 2007; **21**:1203–8.
- 67 Chambers CJ, Parsi KK, Schupp C *et al.* Patient-centered online management of psoriasis: a randomized controlled equivalency trial. *J Am Acad Dermatol* 2012; **66**:948–53.
- 68 Choonhakarn C, Busaracome P, Sripanidkulchai B *et al.* A prospective, randomized clinical trial comparing topical aloe vera with 0.1% triamcinolone acetonide in mild to moderate plaque psoriasis. *J Eur Acad Dermatol Venereol* 2010; **24**:168–72.
- 69 Chua SHH, Tioleco GMS, Dayrit CAF *et al.* Atorvastatin as adjunctive therapy for chronic plaque type psoriasis versus betamethasone valerate alone: a randomized, double-blind, placebo-controlled trial. *Indian J Dermatol Venereol Leprol* 2017; **83**:441–7.
- 70 Damiani G, Conic RRZ, de Vita V *et al.* When IL-17 inhibitors fail: real-life evidence to switch from secukinumab to adalimumab or ustekinumab. *Dermatol Ther (Heidelb)* 2019; **32**:e12793.
- 71 Dauden E, Griffiths CEM, Ortonne JP *et al.* Improvements in patient-reported outcomes in moderate-to-severe psoriasis patients receiving continuous or paused etanercept treatment over 54 weeks: the CRYSTEL study. *J Eur Acad Dermatol Venereol* 2009; **23**:1374–82.
- 72 Domogalla L, Beck A, Schulze-Hagen T *et al.* Impact of an eHealth smartphone app on the mental health of patients with psoriasis: prospective randomized controlled intervention study. *JMIR Mhealth Uhealth* 2021; **9**:e28149.
- 73 Drouin R, Moroni O, Cantin K *et al.* A double-blind, placebo-controlled, randomized trial of XP-828L (800 mg) on the quality of life and clinical symptoms of patients with mild-to-moderate psoriasis. *Alt Med Rev J Clin Ther* 2008; **13**:145–52.
- 74 Elewski BE, Puig L, Mordin M *et al.* Psoriasis patients with Psoriasis Area and Severity Index (PASI) 90 response achieve greater health-related quality-of-life improvements than those with PASI 75–89 response: results from two phase 3 studies of secukinumab. *J Dermatolog Treat* 2017; **28**:492–9.
- 75 Ellis CN, Mordin MM, Adler EY *et al.* Effects of alefacept on health-related quality of life in patients with psoriasis: results from a randomized, placebo-controlled phase II trial. *Am J Clin Dermatol* 2003; **4**:131–9.
- 76 Ersser SJ, Cowdell FC, Nicholls PG *et al.* A pilot randomized controlled trial to examine the feasibility and efficacy of an educational nursing intervention to improve self-management practices in patients with mild-moderate psoriasis. *J Eur Acad Dermatol Venereol* 2012; **26**:738–45.
- 77 Evans R, Li S, Dooley LT *et al.* Infliximab induction therapy for patients with severe plaque-type psoriasis: a randomized, double-blind, placebo-controlled trial. *J Am Acad Dermatol* 2004; **51**:534–42.
- 78 Eysteinsdottir JH, Olafsson JH, Agnarsson BA *et al.* Psoriasis treatment: faster and long-standing results after bathing in geothermal seawater. A randomized trial of three UVB phototherapy regimens. *Photodermatol Photoimmunol Photomed* 2014; **30**:25–34.
- 79 Faurschou A, Gyldenlove M, Rohde U *et al.* Lack of effect of the glucagon-like peptide-1 receptor agonist liraglutide on psoriasis in glucose-tolerant patients – a randomized placebo-controlled trial. *J Eur Acad Dermatol Venereol* 2015; **29**:555–9.



- 80 Feldman SR, Gomez B, Meng X *et al.* Secukinumab rapidly improves EQ-5D health status in patients with psoriasis: pooled analysis from four phase 3 trials. *J Dermatolog Treat* 2021; **32**:709–15.
- 81 Feldman SR, Gordon KB, Bala M *et al.* Infliximab treatment results in significant improvement in the quality of life of patients with severe psoriasis: a double-blind placebo-controlled trial. *Br J Dermatol* 2005; **152**:954–60.
- 82 Feldman SR, Gottlieb AB, Bala M *et al.* Infliximab improves health-related quality of life in the presence of comorbidities among patients with moderate-to-severe psoriasis. *Br J Dermatol* 2008; **159**:704–10.
- 83 Feldman SR, Kimball AB, Krueger GG *et al.* Etanercept improves the health-related quality of life of patients with psoriasis: results of a phase III randomized clinical trial. *J Am Acad Dermatol* 2005; **53**:887–9.
- 84 Feldman SR, Menter A, Koo JY. Improved health-related quality of life following a randomized controlled trial of alefacept treatment in patients with chronic plaque psoriasis. *Br J Dermatol* 2004; **150**:317–26.
- 85 Feldman SR, Reznichenko N, Pulka G *et al.* Efficacy, safety and immunogenicity of AVT02 versus originator adalimumab in subjects with moderate to severe chronic plaque psoriasis: a multicentre, double-blind, randomised, parallel group, active control, phase III study. *BioDrugs* 2021; **35**:735–48.
- 86 Feldman SR, Thaçi D, Gooderham M *et al.* Tofacitinib improves pruritus and health-related quality of life up to 52 weeks: results from 2 randomized phase III trials in patients with moderate to severe plaque psoriasis. *J Am Acad Dermatol* 2016; **75**:1162–70.e3.
- 87 Finlay AY, Salek MS, Haney J *et al.* Intramuscular alefacept improves health-related quality of life in patients with chronic plaque psoriasis. *Dermatology* 2003; **206**:307–15.
- 88 Flytstrom I, Stenberg B, Svensson A *et al.* Methotrexate vs. ciclosporin in psoriasis: effectiveness, quality of life and safety. A randomized controlled trial. *Br J Dermatol* 2008; **158**:116–21.
- 89 Gahalaut P, Soodan PS, Mishra N *et al.* Clinical efficacy of psoralen + sunlight vs. combination of isotretinoin and psoralen + sunlight for the treatment of chronic plaque-type psoriasis vulgaris: a randomized hospital-based study. *Photodermatol Photoimmunol Photomed* 2014; **30**:294–301.
- 90 Galvez Galve JJ, Peiro PS, Perez MB *et al.* Quality of life and assessment after local application of sulphurous water in the home environment in patients with psoriasis vulgaris: a randomized placebo-controlled pilot study. *Eur J Integrative Med* 2012; **4**:e213–8.
- 91 Gelfand JM, Kimball AB, Mostow EN *et al.* Patient-reported outcomes and health-care resource utilization in patients with psoriasis treated with etanercept: continuous versus interrupted treatment. *Value Health* 2008; **11**:400–7.
- 92 Gerdes S, Korber A, Biermann M *et al.* Absolute and relative Psoriasis Area and Severity Index (PASI) treatment goals and their association with health-related quality of life. *J Dermatolog Treat* 2020; **31**:470–5.
- 93 Ghiasi M, Ebrahimi S, Lajevardi V *et al.* Efficacy and safety of pioglitazone plus phototherapy versus phototherapy in patients with plaque type psoriasis: a double blinded randomized controlled trial. *J Dermatolog Treat* 2019; **30**:664–7.
- 94 Gniadecki R, Robertson D, Molta CT *et al.* Self-reported health outcomes in patients with psoriasis and psoriatic arthritis randomized to two etanercept regimens. *J Eur Acad Dermatol Venereol* 2012; **26**:1436–43.
- 95 Gold LS, Lebwohl MG, Sugarman JL *et al.* Safety and efficacy of a fixed combination of halobetasol and tazarotene in the treatment of moderate-to-severe plaque psoriasis: results of 2 phase 3 randomized controlled trials. *J Am Acad Dermatol* 2018; **79**:287–93.
- 96 Stein Gold L, Papp K, Pariser D *et al.* Efficacy and safety of apremilast in patients with mild to moderate plaque psoriasis: results of a phase 3, multicenter, randomized, double-blind, placebo-controlled trial. *J Am Acad Dermatol* 2022; **86**:77–85.
- 97 Gooderham MJ, Elewski B, Augustin M *et al.* Effect of ixekizumab on patient reported outcomes and quality of life in patients with moderate-to-severe plaque psoriasis: 5-year results from the UNCOVER-1 and -2 studies. *J Drugs Dermatol* 2021; **20**:394–401.
- 98 Gordon K, Korman N, Frankel E *et al.* Efficacy of etanercept in an integrated multistudy database of patients with psoriasis. *J Am Acad Dermatol* 2006; **54**:S101–11.
- 99 Gordon KB, Kimball AB, Chau D *et al.* Impact of brodalumab treatment on psoriasis symptoms and health-related quality of life: use of a novel patient-reported outcome measure, the Psoriasis Symptom Inventory. *Br J Dermatol* 2014; **170**:705–15.
- 100 Gordon KB, Langley RG, Gottlieb AB *et al.* A phase III, randomized, controlled trial of the fully human IL-12/23 mAb briakinumab in moderate-to-severe psoriasis. *J Invest Dermatol* 2012; **132**:304–14.
- 101 Gordon KB, Papp KA, Hamilton TK *et al.* Efficacy and safety of efalizumab for patients with moderate to severe plaque psoriasis: a randomized controlled trial. *JAMA* 2003; **290**:3073–80.
- 102 Gordon KB, Strober B, Lebwohl M *et al.* Efficacy and safety of risankizumab in moderate-to-severe plaque psoriasis (UltIMMa-1 and UltIMMa-2): results from two double-blind, randomized, placebo-controlled and ustekinumab-controlled phase 3 trials. *Lancet* 2018; **392**:650–61.
- 103 Gottlieb A, Sullivan J, van Doorn M *et al.* Secukinumab shows significant efficacy in palmoplantar psoriasis: results from GESTURE, a randomized controlled trial. *J Am Acad Dermatol* 2017; **76**:70–80.
- 104 Gottlieb AB, Kubanov A, van Doorn M *et al.* Sustained efficacy of secukinumab in patients with moderate-to-severe palmoplantar psoriasis: 2.5-year results from GESTURE, a randomized, double-blind, placebo-controlled trial. *Br J Dermatol* 2020; **182**:889–99.
- 105 Greenberger S, Harats D, Salameh F *et al.* 9-cis-rich  $\beta$ -carotene powder of the alga *Dunaliella* reduces the severity of chronic plaque psoriasis: a randomized, double-blind, placebo-controlled clinical trial. *J Am Coll Nutr* 2012; **31**:320–6.
- 106 Griffiths CE, Stein Gold L, Cambazard F *et al.* Greater improvement in quality of life outcomes in patients using fixed-combination calcipotriol plus betamethasone dipropionate aerosol foam versus gel: results from the PSO-ABLE study. *Eur J Dermatol* 2018; **28**:356–63.
- 107 Griffiths CEM, Papp KA, Song M *et al.* Continuous treatment with guselkumab maintains clinical responses through 4 years in patients with moderate-to-severe psoriasis: results from VOYAGE 1. *J Dermatolog Treat* 2022; **33**:848–56.
- 108 Griffiths CEM, Reich K, Lebwohl M *et al.* Comparison of ixekizumab with etanercept or placebo in moderate-to-severe psoriasis (UNCOVER-2 and UNCOVER-3): results from two phase 3 randomised trials. *Lancet* 2015; **386**:541–51.
- 109 Griffiths CEM, Sterry W, Brock F *et al.* Pattern of response in patients with moderate-to-severe psoriasis treated with etanercept. *Br J Dermatol* 2015; **172**:230–8.
- 110 Griffiths CEM, Vender R, Sofen H *et al.* Effect of tofacitinib withdrawal and re-treatment on patient-reported outcomes: results from a phase 3 study in patients with moderate to severe chronic plaque psoriasis. *J Eur Acad Dermatol Venereol* 2017; **31**:323–32.
- 111 Guenther L, Han C, Schenkel B *et al.* Impact of ustekinumab on health-related quality of life and sexual difficulties associated with psoriasis: results from two phase III clinical trials. *J Eur Acad Dermatol Venereol* 2011; **25**:851–7.



- 112 Guenther L, Warren RB, Cather JC *et al.* Impact of ixekizumab treatment on skin-related personal relationship difficulties in moderate-to-severe psoriasis patients: 12-week results from two phase 3 trials. *J Eur Acad Dermatol Venereol* 2017; **31**:1867–75.
- 113 Gupta AK, Langley RG, Lynde C *et al.* ISA247: quality of life results from a phase II, randomized, placebo-controlled study. *J Cutan Med Surg* 2008; **12**:268–75.
- 114 Hampton P, Halliday A, Aassi M *et al.* Twelve-week secukinumab treatment is consistently efficacious for moderate-to-severe psoriasis regardless of prior biologic and non-biologic systemic treatment: post hoc analysis of six randomised trials. *J Eur Acad Dermatol Venereol* 2021; **35**:928–37.
- 115 Hamzavi IH, Sundaram M, Nicholson C *et al.* Uncovering burden disparity: a comparative analysis of the impact of moderate-to-severe psoriasis and hidradenitis suppurativa. *J Am Acad Dermatol* 2017; **77**:1038–46.
- 116 Higgins E, Ralph N, Ryan S *et al.* A randomised half body prospective study of low and medium dose regimens using the 308 nm excimer laser in the treatment of localised psoriasis. *J Dermatolog Treat* 2017; **28**:8–13.
- 117 Houghton K, Patil D, Gomez B *et al.* Correlation between change in Psoriasis Area and Severity Index and Dermatology Life Quality Index in patients with psoriasis: pooled analysis from four phase 3 clinical trials of secukinumab. *Dermatol Ther (Heidelb)* 2021; **11**:1373–84.
- 118 Igarashi A, Kato T, Kato M *et al.* Efficacy and safety of ustekinumab in Japanese patients with moderate-to-severe plaque-type psoriasis: long-term results from a phase 2/3 clinical trial. *J Dermatol* 2012; **39**:242–52.
- 119 Jalili A, Calzavara-Pinton P, Kircik L *et al.* Quality of life and patient-perceived symptoms in patients with psoriasis undergoing proactive or reactive management with the fixed-dose combination Cal/BD foam: a post-hoc analysis of PSO-LONG. *J Eur Acad Dermatol Venereol* 2021; **36**:60–7.
- 120 Jarrett P, Camargo CA Jr, Coomarasamy C, Scragg R. A randomized, double-blind, placebo-controlled trial of the effect of monthly vitamin D supplementation in mild psoriasis. *J Dermatolog Treat* 2018; **29**:324–8.
- 121 Jawed F, Rizvi F, Azhar A *et al.* Comparison of atorvastatin and 0.1% betamethasone valerate in psoriatic patients. *Rawal Med J* 2020; **45**:282–6.
- 122 Jensen P, Christensen R, Zachariae C *et al.* Long-term effects of weight reduction on the severity of psoriasis in a cohort derived from a randomized trial: a prospective observational follow-up study. *Am J Clin Nutr* 2016; **104**:259–65.
- 123 Jensen P, Zachariae C, Christensen R *et al.* Effect of weight loss on the severity of psoriasis: a randomized clinical study. *JAMA Dermatol* 2013; **149**:795–801.
- 124 Kemeny L, Berggren L, Dossenbach M *et al.* Efficacy and safety of ixekizumab in patients with plaque psoriasis across different degrees of disease severity: results from UNCOVER-2 and UNCOVER-3. *J Dermatolog Treat* 2019; **30**:19–26.
- 125 Khoury LR, Moller T, Zachariae C *et al.* A prospective 52-week randomized controlled trial of patient-initiated care consultations for patients with psoriasis. *Br J Dermatol* 2018; **179**:301–8.
- 126 Kimball AB, Bensimon AG, Guerin A *et al.* Efficacy and safety of adalimumab among patients with moderate to severe psoriasis with co-morbidities: subanalysis of results from a randomized, double-blind, placebo-controlled, phase III trial. *Am J Clin Dermatol* 2011; **12**:51–62.
- 127 Kimball AB, Gordon KB, Fakhrazadeh S *et al.* Long-term efficacy of ustekinumab in patients with moderate-to-severe psoriasis: results from the PHOENIX 1 trial through up to 3 years. *Br J Dermatol* 2012; **166**:861–72.
- 128 Kimball AB, Yu AP, Signorovitch J *et al.* The effects of adalimumab treatment and psoriasis severity on self-reported work productivity and activity impairment for patients with moderate to severe psoriasis. *J Am Acad Dermatol* 2012; **66**:e67–76.
- 129 Kircik L, Fowler J, Weiss J *et al.* Efficacy of secukinumab for moderate-to-severe head and neck psoriasis over 52 weeks: pooled analysis of four phase 3 studies. *Dermatol Ther (Heidelb)* 2016; **6**:627–38.
- 130 Korber A, Papavassilis C, Bhosekar V *et al.* Efficacy and safety of secukinumab in elderly subjects with moderate to severe plaque psoriasis: a pooled analysis of phase III studies. *Drugs Aging* 2018; **35**:135–44.
- 131 Korman NJ, Sofen H, Fretzin S *et al.* Secukinumab provides better relief from the impact of psoriasis on daily activities and personal relationships than etanercept: results of two phase 3 placebo-controlled randomized clinical trials in moderate-to-severe psoriasis. *J Dermatolog Treat* 2017; **28**:384–9.
- 132 Krueger GG, Langley RG, Finlay AY *et al.* Patient-reported outcomes of psoriasis improvement with etanercept therapy: results of a randomized phase III trial. *Br J Dermatol* 2005; **153**:1192–9.
- 133 Krupashankar DS, Dogra S, Kura M *et al.* Efficacy and safety of itolizumab, a novel anti-CD6 monoclonal antibody, in patients with moderate to severe chronic plaque psoriasis: results of a double-blind, randomized, placebo-controlled, phase-III study. *J Am Acad Dermatol* 2014; **71**:484–92.
- 134 Kt S, Thakur V, Narang T *et al.* Comparison of the efficacy and safety of apremilast and methotrexate in patients with palmoplantar psoriasis: a randomized controlled trial. *Am J Clin Dermatol* 2021; **22**:415–23.
- 135 Kunynetz R, Carey W, Thomas R *et al.* Quality of life in plaque psoriasis patients treated with voclosporin: a Canadian phase III, randomized, multicenter, double-blind, placebo-controlled study. *Eur J Dermatol* 2011; **21**:89–94.
- 136 Lajevardi V, Hallaji Z, Daklan S *et al.* The efficacy of methotrexate plus pioglitazone vs. methotrexate alone in the management of patients with plaque-type psoriasis: a single-blinded randomized controlled trial. *Int J Dermatol* 2015; **54**:95–101.
- 137 Lambert J, Hansen JB, Sohr A *et al.* Dermatology Life Quality Index in patients with moderate-to-severe plaque psoriasis treated with brodalumab or ustekinumab. *Dermatol Ther (Heidelb)* 2021; **11**:1265–75.
- 138 Langley RG, Armstrong AW, Lebwohl MG *et al.* Efficacy and safety of brodalumab in patients with psoriasis who had inadequate responses to ustekinumab: subgroup analysis of two randomized phase III trials. *Br J Dermatol* 2019; **180**:306–14.
- 139 Langley RG, Feldman SR, Han C *et al.* Ustekinumab significantly improves symptoms of anxiety, depression, and skin-related quality of life in patients with moderate-to-severe psoriasis: results from a randomized, double-blind, placebo-controlled phase III trial. *J Am Acad Dermatol* 2010; **63**:457–65.
- 140 Langley RG, Tsai TF, Flavin S *et al.* Efficacy and safety of guselkumab in patients with psoriasis who have an inadequate response to ustekinumab: results of the randomized, double-blind, phase III NAVIGATE trial. *Br J Dermatol* 2018; **178**:114–23.
- 141 Langley RGB, Reich K, Strand V *et al.* Ixekizumab treatment and the impact on SF-36: results from three pivotal phase III randomised controlled trials in patients with moderate-to-severe plaque psoriasis. *Quality Life Res* 2020; **29**:369–80.
- 142 Larsen MH, Wahl AK, Krogstad A-L, Aas E. Cost-utility analysis of supported self-management with motivational interviewing for patients with psoriasis. *Acta Derm Venereol* 2016; **96**:664–8.
- 143 Lebwohl M, Papp K, Han C *et al.* Ustekinumab improves health-related quality of life in patients with moderate-to-severe psoriasis: results from the PHOENIX 1 trial. *Br J Dermatol* 2010; **162**:137–46.
- 144 Lebwohl MG, Papp KA, Morch MH *et al.* Long-term proactive treatment of plaque psoriasis with calcipotriene/betamethasone

- dipropionate foam prolongs remission and reduces relapses irrespective of patient baseline characteristics. *Dermatol Ther (Heidelb)* 2021; **11**:1657–65.
- 145 Lee JH, Park CJ, Kim TY *et al.* Optimal maintenance treatment with calcipotriol/betamethasone dipropionate gel in Korean patients with psoriasis vulgaris: a multicentre randomized, controlled clinical trial. *J Eur Acad Dermatol Venereol* 2017; **31**:483–9.
- 146 Leonardi C, Bagel J, Yamauchi P *et al.* The aerosol foam formulation of the fixed combination calcipotriene plus betamethasone dipropionate improves the health-related quality of life in patients with psoriasis vulgaris: results from the randomized PSO-FAST study. *J Drugs Dermatol* 2016; **15**:981–7.
- 147 Leonardi C, See K, Gallo G *et al.* Psoriasis severity assessment combining physician and patient reported outcomes: the optimal psoriasis assessment tool. *Dermatol Ther (Heidelb)* 2021; **11**:1249–63.
- 148 Leonardi CL, Blauvelt A, Sofen HL *et al.* Rapid improvements in health-related quality of life and itch with ixekizumab treatment in randomized phase 3 trials: results from UNCOVER-2 and UNCOVER-3. *J Eur Acad Dermatol Venereol* 2017; **31**:1483–90.
- 149 Li N, Teeple A, Muser E *et al.* Work/study productivity gain and associated indirect cost savings with guselkumab compared with adalimumab in moderate-to-severe psoriasis: results from the VOYAGE 1 study. *J Dermatolog Treat* 2022; **33**:278–83.
- 150 Lin L, Xu X, Yu Y *et al.* Glucagon-like peptide-1 receptor agonist liraglutide therapy for psoriasis patients with type 2 diabetes: a randomized-controlled trial. *J Dermatolog Treat* 2020; **33**:1–7.
- 151 Lin YK, See LC, Huang YH *et al.* Comparison of indirubin concentrations in indigo naturalis ointment for psoriasis treatment: a randomized, double-blind, dosage-controlled trial. *Br J Dermatol* 2018; **178**:124–31.
- 152 Lloyd A, Reeves P, Conway P *et al.* Economic evaluation of etanercept in the management of chronic plaque psoriasis. *Br J Dermatol* 2009; **160**:380–6.
- 153 Lu C-J, Xiang Y, Xie X-L *et al.* A randomized controlled single-blind clinical trial on 84 outpatients with psoriasis vulgaris by auricular therapy combined with optimized Yinxieling Formula. *Chinese J Integr Med* 2012; **18**:186–91.
- 154 Luger TA, Barker J, Lambert J *et al.* Sustained improvement in joint pain and nail symptoms with etanercept therapy in patients with moderate-to-severe psoriasis. *J Eur Acad Dermatol Venereol* 2009; **23**:896–904.
- 155 Mamolo C, Harness J, Tan H *et al.* Tofacitinib (CP-690,550), an oral Janus kinase inhibitor, improves patient-reported outcomes in a phase 2b, randomized, double-blind, placebo-controlled study in patients with moderate-to-severe psoriasis. *J Eur Acad Dermatol Venereol* 2014; **28**:192–203.
- 156 McMichael A, Desai SR, Qureshi A *et al.* Efficacy and safety of brodalumab in patients with moderate-to-severe plaque psoriasis and skin of color: results from the pooled AMAGINE-2/3 randomized trials. *Am J Clin Dermatol* 2019; **20**:267–76.
- 157 Menter A, Augustin M, Signorovitch J *et al.* The effect of adalimumab on reducing depression symptoms in patients with moderate to severe psoriasis: a randomized clinical trial. *J Am Acad Dermatol* 2010; **62**:812–18.
- 158 Menter A, Gordon K, Carey W *et al.* Efficacy and safety observed during 24 weeks of efalizumab therapy in patients with moderate to severe plaque psoriasis. *Arch Dermatol* 2005; **141**:31–8.
- 159 Menter A, Kosinski M, Bresnahan BW *et al.* Impact of efalizumab on psoriasis-specific patient-reported outcomes. Results from three randomized, placebo-controlled clinical trials of moderate to severe plaque psoriasis. *J Drugs Dermatol* 2004; **3**:27–38.
- 160 Militello G, Xia A, Stevens SR *et al.* Etanercept for the treatment of psoriasis in the elderly. *J Am Acad Dermatol* 2006; **55**:517–19.
- 161 Moludi J, Khedmatgozar H, Saiedi S *et al.* Probiotic supplementation improves clinical outcomes and quality of life indicators in patients with plaque psoriasis: a randomized double-blind clinical trial. *Clin Nutr* 2021; **46**:33–9.
- 162 Moore A, Gordon KB, Kang S *et al.* A randomized, open-label trial of continuous versus interrupted etanercept therapy in the treatment of psoriasis. *J Am Acad Dermatol* 2007; **56**:598–603.
- 163 Mrasz S, Leonardi C, Colon LE *et al.* Different treatment outcomes with different formulations of clobetasol propionate 0.05% for the treatment of plaque psoriasis. *J Dermatolog Treat* 2008; **19**:354–9.
- 164 Mrowietz U, Kragballe K, Reich K *et al.* An assessment of adalimumab efficacy in three phase III clinical trials using the European Consensus Programme criteria for psoriasis treatment goals. *Br J Dermatol* 2013; **168**:374–80.
- 165 Mrowietz U, Leonardi CL, Girolomoni G *et al.* Secukinumab retreatment-as-needed versus fixed-interval maintenance regimen for moderate to severe plaque psoriasis: a randomized, double-blind, noninferiority trial (SCULPTURE). *J Am Acad Dermatol* 2015; **73**:27–36.
- 166 Nakagawa H, Niino H, Ootaki K *et al.* Brodalumab, a human anti-interleukin-17-receptor antibody in the treatment of Japanese patients with moderate-to-severe plaque psoriasis: efficacy and safety results from a phase II randomized controlled study. *J Dermatol Sci* 2016; **81**:44–52.
- 167 Nakagawa H, Schenkel B, Kato M *et al.* Impact of ustekinumab on health-related quality of life in Japanese patients with moderate-to-severe plaque psoriasis: results from a randomized, double-blind, placebo-controlled phase 2/3 trial. *J Dermatol* 2012; **39**:761–9.
- 168 Nast A, Dressler C, Dilleen M *et al.* Time, Psoriasis Area and Severity Index and Dermatology Life Quality Index of patients with psoriasis who drop out of clinical trials on etanercept because of lack of efficacy: a pooled analysis from 10 clinical trials. *Br J Dermatol* 2018; **178**:400–5.
- 169 Noe MH, Wan MT, Shin DB *et al.* Patient-reported outcomes of adalimumab, phototherapy, and placebo in the Vascular Inflammation in Psoriasis trial: a randomized controlled study. *J Am Acad Dermatol* 2019; **81**:923–30.
- 170 Ohtsuki M, Kubo H, Morishima H *et al.* Guselkumab, an anti-interleukin-23 monoclonal antibody, for the treatment of moderate to severe plaque-type psoriasis in Japanese patients: efficacy and safety results from a phase 3, randomized, double-blind, placebo-controlled study. *J Dermatol* 2018; **45**:1053–62.
- 171 Okubo Y, Ohtsuki M, Morita A *et al.* Long-term efficacy and safety of secukinumab in Japanese patients with moderate to severe plaque psoriasis: 3-year results of a double-blind extension study. *J Dermatol* 2019; **46**:186–92.
- 172 Ortonne JP, Shear N, Shumack S *et al.* Impact of efalizumab on patient-reported outcomes in high-need psoriasis patients: results of the international, randomized, placebo-controlled phase III Clinical Experience Acquired with Raptiva (CLEAR) trial. *BMC Dermatol* 2005; **5**:13.
- 173 Pan H-D, Qi X-L, Wang L *et al.* Whether fire-needle therapy benefits plaque psoriasis: a multicenter, randomized, and controlled trial. *Chinese J Integr Med* 2019; **25**:259–63.
- 174 Papp K, Menter A, Strober B *et al.* Efficacy and safety of brodalumab in subpopulations of patients with difficult-to-treat moderate-to-severe plaque psoriasis. *J Am Acad Dermatol* 2014; **72**:436–9.e1.
- 175 Papp KA, Barber K, Bissonnette R *et al.* Improvements in patient-reported outcomes in patients with psoriasis receiving etanercept plus topical therapies: results from REFINE. *J Eur Acad Dermatol Venereol* 2015; **29**:1555–61.
- 176 Papp KA, Bissonnette R, Gooderham M *et al.* Treatment of plaque psoriasis with an ointment formulation of the Janus

- kinase inhibitor, tofacitinib: a phase 2b randomized clinical trial. *BMC Dermatol* 2016; **16**:15.
- 177 Papp KA, Gordon KB, Langley RG *et al.* Impact of previous biologic use on the efficacy and safety of brodalumab and ustekinumab in patients with moderate-to-severe plaque psoriasis: integrated analysis of the randomized controlled trials AMAGINE-2 and AMAGINE-3. *Br J Dermatol* 2018; **179**:320–8.
- 178 Papp KA, Menter MA, Abe M *et al.* Tofacitinib, an oral Janus kinase inhibitor, for the treatment of chronic plaque psoriasis: results from two randomized, placebo-controlled, phase III trials. *Br J Dermatol* 2015; **173**:949–61.
- 179 Papp KA, Signorovitch J, Ramakrishnan K *et al.* Effects of adalimumab versus placebo on risk of symptom worsening in psoriasis and subsequent impacts on health-related quality-of-life: analysis of pooled data from two randomized, double-blind, placebo-controlled, multicentre clinical trials. *Clin Drug Invest* 2011; **31**:51–60.
- 180 Papp KA, Soliman AM, Done N *et al.* Deterioration of health-related quality of life after withdrawal of risankizumab treatment in patients with moderate-to-severe plaque psoriasis: a machine learning predictive model. *Dermatol Ther (Heidelb)* 2021; **11**:1291–304.
- 181 Papp KA, Sundaram M, Bao Y *et al.* Effects of briakinumab treatment for moderate to severe psoriasis on health-related quality of life and work productivity and activity impairment: results from a randomized phase III study. *J Eur Acad Dermatol Venereol* 2014; **28**:790–8.
- 182 Papp KA, Yang M, Sundaram M *et al.* Comparison of adalimumab and etanercept for the treatment of moderate to severe psoriasis: an indirect comparison using individual patient data from randomized trials. *Value Health* 2018; **21**:1–8.
- 183 Paul C, Cather J, Gooderham M *et al.* Efficacy and safety of apremilast, an oral phosphodiesterase 4 inhibitor, in patients with moderate-to-severe plaque psoriasis over 52 weeks: a phase III, randomized controlled trial (ESTEEM 2). *Br J Dermatol* 2015; **173**:1387–99.
- 184 Paul C, Guenther L, Torii H *et al.* Impact of ixekizumab on facial psoriasis and related quality of life measures in moderate-to-severe psoriasis patients: 12-week results from two phase III trials. *J Eur Acad Dermatol Venereol* 2018; **32**:68–72.
- 185 Paul C, Leonardi C, Menter A *et al.* Calcipotriol plus betamethasone dipropionate aerosol foam in patients with moderate-to-severe psoriasis: sub-group analysis of the PSO-ABLE study. *Am J Clin Dermatol* 2017; **18**:405–11.
- 186 Paul C, Puig L, Kragballe K *et al.* Transition to ustekinumab in patients with moderate-to-severe psoriasis and inadequate response to methotrexate: a randomized clinical trial (TRANSIT). *Br J Dermatol* 2014; **170**:425–34.
- 187 Pfaff S, Merk HF, Von Felbert V *et al.* Prospective randomized long-term study on the efficacy and safety of UV-free blue light for treating mild psoriasis vulgaris. *Dermatology* 2015; **231**:24–34.
- 188 Pink AE, Jalili A, Berg P *et al.* Rapid onset of action of calcipotriol/betamethasone dipropionate cutaneous foam in psoriasis, even in patients with more severe disease. *J Eur Acad Dermatol Venereol* 2019; **33**:1116–23.
- 189 Pinter A, Green LJ, Selmer J *et al.* A pooled analysis of randomized, controlled, phase 3 trials investigating the efficacy and safety of a novel, fixed dose calcipotriene and betamethasone dipropionate cream for the topical treatment of plaque psoriasis. *J Eur Acad Dermatol Venereol* 2022; **36**:228–36.
- 190 Pinter A, Hoffmann M, Reich K *et al.* A phase 4, randomized, head-to-head trial comparing the efficacy of subcutaneous injections of brodalumab to oral administrations of fumaric acid esters in adults with moderate-to-severe plaque psoriasis (CHANGE). *J Eur Acad Dermatol Venereol* 2021; **35**:701–11.
- 191 Poulin Y, Crowley JJ, Langley RG *et al.* Efficacy of adalimumab across subgroups of patients with moderate-to-severe chronic plaque psoriasis of the hands and/or feet: post hoc analysis of REACH. *J Eur Acad Dermatol Venereol* 2014; **28**:882–90.
- 192 Poulin Y, Sheth P, Gu Y *et al.* Health-related quality of life worsens disproportionately to objective signs of psoriasis after withdrawal of adalimumab therapy. *Dermatol Ther (Heidelb)* 2014; **4**:33–42.
- 193 Prussick R, Unnebrink K, Valdecantos WC. Efficacy of adalimumab compared with methotrexate or placebo stratified by baseline BMI in a randomized placebo-controlled trial in patients with psoriasis. *J Drugs Dermatol* 2015; **14**:864–8.
- 194 Puig L, Augustin M, Blauvelt A *et al.* Effect of secukinumab on quality of life and psoriasis-related symptoms: a comparative analysis versus ustekinumab from the CLEAR 52-week study. *J Am Acad Dermatol* 2018; **78**:741–8.
- 195 Puig L, Dossenbach M, Berggren L *et al.* Absolute and relative psoriasis area and severity indices (PASI) for comparison of the efficacy of ixekizumab to etanercept and placebo in patients with moderate-to-severe plaque psoriasis: an integrated analysis of UNCOVER-2 and UNCOVER-3 outcomes. *Acta Derm Venereol* 2019; **99**:971–7.
- 196 Puig L, Lomaga M, Hollister K *et al.* An analysis of patient-reported outcomes in IXORA-S: comparing ixekizumab and ustekinumab over 52 weeks in moderate-to-severe psoriasis. *Acta Derm Venereol* 2020; **100**:adv00344.
- 197 Puig L, Wu JJ, Gooderham MJ *et al.* Consistent response to guselkumab treatment between Hispanic and non-Hispanic patients with psoriasis: an analysis from VOYAGE 1 and VOYAGE 2. *J Dermatolog Treat* 2021; **32**:484–91.
- 198 Reich K, Armstrong AW, Foley P *et al.* Maintenance of response through up to 4 years of continuous guselkumab treatment of psoriasis in the VOYAGE 2 phase 3 study. *Am J Clin Dermatol* 2020; **21**:881–90.
- 199 Reich K, Augustin M, Thaci D *et al.* A 24-week multicentre, randomized, open-label, parallel-group study comparing the efficacy and safety of ixekizumab vs. fumaric acid esters and methotrexate in patients with moderate-to-severe plaque psoriasis naive to systemic treatment. *Br J Dermatol* 2020; **182**:869–79.
- 200 Reich K, Foley P, Han C *et al.* Guselkumab improves work productivity in patients with moderate-to-severe psoriasis with or without depression and anxiety: results from the VOYAGE 2 comparator study versus adalimumab. *J Dermatolog Treat* 2020; **31**:617–23.
- 201 Reich K, Gooderham M, Bewley A *et al.* Safety and efficacy of apremilast through 104 weeks in patients with moderate to severe psoriasis who continued on apremilast or switched from etanercept treatment: findings from the LIBERATE study. *J Eur Acad Dermatol Venereol* 2018; **32**:397–402.
- 202 Reich K, Gooderham M, Green L *et al.* The efficacy and safety of apremilast, etanercept and placebo in patients with moderate-to-severe plaque psoriasis: 52-week results from a phase IIIb, randomized, placebo-controlled trial (LIBERATE). *J Eur Acad Dermatol Venereol* 2017; **31**:507–17.
- 203 Reich K, Gordon KB, Strober BE *et al.* Five-year maintenance of clinical response and health-related quality of life improvements in patients with moderate-to-severe psoriasis treated with guselkumab: results from VOYAGE 1 and VOYAGE 2. *Br J Dermatol* 2021; **185**:1146–59.
- 204 Reich K, Griffiths CEM, Gordon KB *et al.* Maintenance of clinical response and consistent safety profile with up to 3 years of continuous treatment with guselkumab: results from the VOYAGE 1 and VOYAGE 2 trials. *J Am Acad Dermatol* 2020; **82**:936–45.
- 205 Reich K, Korber A, Mrowietz U *et al.* Secukinumab 2-weekly vs. 4-weekly dosing in patients with plaque-type psoriasis: results from the randomized GAIN study. *Br J Dermatol* 2021; **184**:849–56.
- 206 Reich K, Nestle FO, Papp K *et al.* Improvement in quality of life with infliximab induction and maintenance therapy in patients



- with moderate-to-severe psoriasis: a randomized controlled trial. *Br J Dermatol* 2006; **154**:1161–8.
- 207 Reich K, Nestle FO, Wu Y *et al.* Infliximab treatment improves productivity among patients with moderate-to-severe psoriasis. *Eur J Dermatol* 2007; **17**:381–6.
- 208 Reich K, Papp KA, Blauvelt A *et al.* Tildrakizumab versus placebo or etanercept for chronic plaque psoriasis (reSURFACE 1 and reSURFACE 2): results from two randomised controlled, phase 3 trials. *Lancet* 2017; **390**:276–88.
- 209 Reich K, Pinter A, Lacour JP *et al.* Comparison of ixekizumab with ustekinumab in moderate-to-severe psoriasis: 24-week results from IXORA-S, a phase III study. *Br J Dermatol* 2017; **177**:1014–23.
- 210 Reich K, Puig L, Szepietowski JC *et al.* Secukinumab dosing optimization in patients with moderate-to-severe plaque psoriasis: results from the randomized, open-label OPTIMISE study. *Br J Dermatol* 2020; **182**:304–15.
- 211 Reich K, Rich P, Maari C *et al.* Efficacy and safety of mirikizumab (LY3074828) in the treatment of moderate-to-severe plaque psoriasis: results from a randomized phase II study. *Br J Dermatol* 2019; **181**:88–95.
- 212 Reich K, Schenkel B, Zhao N *et al.* Ustekinumab decreases work limitations, improves work productivity, and reduces work days missed in patients with moderate-to-severe psoriasis: results from PHOENIX 2. *J Dermatolog Treat* 2011; **22**:337–47.
- 213 Reich K, Segaert S, van de Kerkhof P *et al.* Once-weekly administration of etanercept 50 mg improves patient-reported outcomes in patients with moderate-to-severe plaque psoriasis. *Dermatology* 2009; **219**:239–49.
- 214 Reich K, Sullivan J, Arenberger P *et al.* Secukinumab shows high and sustained efficacy in nail psoriasis: 2.5-year results from the randomized placebo-controlled TRANSFIGURE study. *Br J Dermatol* 2021; **184**:425–36.
- 215 Reich K, Sullivan J, Arenberger P *et al.* Effect of secukinumab on the clinical activity and disease burden of nail psoriasis: 32-week results from the randomized placebo-controlled TRANSFIGURE trial. *Br J Dermatol* 2019; **181**:954–66.
- 216 Reich K, Zschocke I, Bachelez H *et al.* A topical treatment optimization programme (TTOP) improves clinical outcome for calcipotriol/betamethasone gel in psoriasis: results of a 64-week multinational randomized phase IV study in 1790 patients (PSO-TOP). *Br J Dermatol* 2017; **177**:197–205.
- 217 Revicki D, Willian MK, Saurat JH *et al.* Impact of adalimumab treatment on health-related quality of life and other patient-reported outcomes: results from a 16-week randomized controlled trial in patients with moderate to severe plaque psoriasis. *Br J Dermatol* 2008; **158**:549–57.
- 218 Revicki DA, Willian MK, Menter A *et al.* Impact of adalimumab treatment on patient-reported outcomes: results from a phase III clinical trial in patients with moderate to severe plaque psoriasis. *J Dermatolog Treat* 2007; **18**:341–50.
- 219 Roberti ML, Ricottini L, Capponi A *et al.* Immunomodulating treatment with low dose interleukin-4, interleukin-10 and interleukin-11 in psoriasis vulgaris. *J Biol Regul Homeost Agents* 2014; **28**:133–9.
- 220 Ryan C, Menter A, Guenther L *et al.* Efficacy and safety of ixekizumab in a randomized, double-blinded, placebo-controlled phase IIIb study of patients with moderate-to-severe genital psoriasis. *Br J Dermatol* 2018; **179**:844–52.
- 221 Salim A, Tan E, Ilchyshyn A *et al.* Folic acid supplementation during treatment of psoriasis with methotrexate: a randomized, double-blind, placebo-controlled trial. *Br J Dermatol* 2006; **154**:1169–74.
- 222 Sarafian G, Afshar M, Mansouri P *et al.* Topical turmeric micro-emulgel in the management of plaque psoriasis; a clinical evaluation. *Iran J Pharm Res* 2015; **14**:865–76.
- 223 Schmitt J, Wozel G, Garzarolli M *et al.* Effectiveness of interdisciplinary vs. dermatological care of moderate-to-severe psoriasis: a pragmatic randomised controlled trial. *Acta Derm Venereol* 2014; **94**:192–7.
- 224 Seo SJ, Shin BS, Lee J-H *et al.* Efficacy and safety of brodalumab in the Korean population for the treatment of moderate to severe plaque psoriasis: a randomized, phase III, double-blind, placebo-controlled study. *J Dermatol* 2021; **48**:807–17.
- 225 Sha H, Zhao J, Guo S *et al.* Combination of Qinzhu Liangxue decoction and acitretin on the treatment of psoriasis vulgaris: a randomized controlled trial. *Int J Clin Exp Med* 2016; **9**:7256–64.
- 226 Shah SK, Arthur A, Yang YC *et al.* A retrospective study to investigate racial and ethnic variations in the treatment of psoriasis with etanercept. *J Drugs Dermatol* 2011; **10**:866–72.
- 227 Shikar R, Heffernan M, Langley RG *et al.* Adalimumab treatment is associated with improvement in health-related quality of life in psoriasis: patient-reported outcomes from a phase II randomized controlled trial. *J Dermatolog Treat* 2007; **18**:25–31.
- 228 Sobell JM, Foley P, Toth D *et al.* Effects of apremilast on pruritus and skin discomfort/pain correlate with improvements in quality of life in patients with moderate to severe plaque psoriasis. *Acta Derm Venereol* 2016; **96**:514–20.
- 229 Sticherling M, Mrowietz U, Augustin M *et al.* Secukinumab is superior to fumaric acid esters in treating patients with moderate-to-severe plaque psoriasis who are naive to systemic treatments: results from the randomized controlled PRIME trial. *Br J Dermatol* 2017; **177**:1024–32.
- 230 Strand V, Fiorentino D, Hu CC *et al.* Improvements in patient-reported outcomes with apremilast, an oral phosphodiesterase 4 inhibitor, in the treatment of moderate to severe psoriasis: results from a phase IIb randomized, controlled study. *Health Qual Life Outcomes* 2013; **11**:82.
- 231 Strober B, Bagel J, Lebwohl M *et al.* Efficacy and safety of apremilast in patients with moderate plaque psoriasis with lower BSA: week 16 results from the UNVEIL study. *J Drugs Dermatol* 2017; **16**:801–8.
- 232 Strober B, Gottlieb AB, Sherif B *et al.* Secukinumab sustains early patient-reported outcome benefits through 1 year: results from 2 phase III randomized placebo-controlled clinical trials comparing secukinumab with etanercept. *J Am Acad Dermatol* 2017; **76**:655–61.
- 233 Su D, Zhang X, Zhang L *et al.* A randomized, double-blind, controlled clinical study on the curative effect of Huaier on mild-to-moderate psoriasis and an experimental study on the proliferation of HaCaT cells. *Biomed Res Int* 2018; **2018**:2372895.
- 234 Svendsen MT, Andersen F, Andersen KH *et al.* A smartphone application supporting patients with psoriasis improves adherence to topical treatment: a randomized controlled trial. *Br J Dermatol* 2018; **179**:1062–71.
- 235 Tanghetti EA, Bhatia N, Drew S *et al.* Fixed-combination halobetasol propionate/tazarotene lotion for psoriasis in patients with 3%–5% affected body surface area. *J Drugs Dermatol* 2021; **20**:829–36.
- 236 Tehlirian C, Peeva E, Kieras E *et al.* Safety, tolerability, efficacy, pharmacokinetics, and pharmacodynamics of the oral TYK2 inhibitor PF-06826647 in participants with plaque psoriasis: a phase 1, randomised, double-blind, placebo-controlled, parallel-group study. *Lancet Rheumatol* 2021; **3**:e204–13.
- 237 Thaci D, Blauvelt A, Reich K *et al.* Secukinumab is superior to ustekinumab in clearing skin of subjects with moderate to severe plaque psoriasis: CLEAR, a randomized controlled trial. *J Am Acad Dermatol* 2015; **73**:400–9.
- 238 Thaci D, Galimberti R, Amaya-Guerra M *et al.* Improvement in aspects of sleep with etanercept and optional adjunctive topical therapy in patients with moderate-to-severe psoriasis: results from the PRISTINE trial. *J Eur Acad Dermatol Venereol* 2014; **28**:900–6.
- 239 Thaci D, Kimball A, Foley P *et al.* Apremilast, an oral phosphodiesterase 4 inhibitor, improves patient-reported outcomes in the

- treatment of moderate to severe psoriasis: results of two phase III randomized, controlled trials. *J Eur Acad Dermatol Venereol* 2017; **31**:498–506.
- 240 Thaci D, Pinter A, Sebastian M *et al.* Guselkumab is superior to fumaric acid esters in patients with moderate-to-severe plaque psoriasis who are naive to systemic treatment: results from a randomized, active-comparator-controlled phase IIIb trial (POLARIS). *Br J Dermatol* 2020; **183**:265–75.
- 241 Thaci D, Soliman AM, Eyerich K *et al.* Patient-reported outcomes with risankizumab versus fumaric acid esters in systemic therapy-naïve patients with moderate to severe plaque psoriasis: a phase 3 clinical trial. *J Eur Acad Dermatol Venereol* 2021; **35**:1686–91.
- 242 Tiplica GS, Salavastru CM. Mometasone furoate 0.1% and salicylic acid 5% vs. mometasone furoate 0.1% as sequential local therapy in psoriasis vulgaris. *J Eur Acad Dermatol Venereol* 2009; **23**:905–12.
- 243 Torii H, Nakagawa H; Japanese Infliximab Study investigators. Infliximab monotherapy in Japanese patients with moderate-to-severe plaque psoriasis and psoriatic arthritis. A randomized, double-blind, placebo-controlled multicenter trial. *J Dermatol Sci* 2010; **59**:40–9.
- 244 Torii H, Sato N, Yoshinari T *et al.* Dramatic impact of a Psoriasis Area and Severity Index 90 response on the quality of life in patients with psoriasis: an analysis of Japanese clinical trials of infliximab. *J Dermatol* 2012; **39**:253–9.
- 245 Tsai T-F, Ho J-C, Song M *et al.* Efficacy and safety of ustekinumab for the treatment of moderate-to-severe psoriasis: a phase III, randomized, placebo-controlled trial in Taiwanese and Korean patients (PEARL). *J Dermatol Sci* 2011; **63**:154–63.
- 246 Tsai T-F, Song M, Shen Y-K *et al.* Ustekinumab improves health-related quality of life in Korean and Taiwanese patients with moderate to severe psoriasis: results from the PEARL trial. *J Drugs Dermatol* 2012; **11**:943–9.
- 247 Tying S, Gordon KB, Poulin Y *et al.* Long-term safety and efficacy of 50 mg of etanercept twice weekly in patients with psoriasis. *Arch Dermatol* 2007; **143**:719–26.
- 248 Tzaneva S, Geroldinger A, Trattner H *et al.* Fumaric acid esters in combination with a 6-week course of narrowband ultraviolet B provides an accelerated response compared with fumaric acid esters monotherapy in patients with moderate-to-severe plaque psoriasis: a randomized prospective clinical study. *Br J Dermatol* 2018; **178**:682–8.
- 249 Umezawa Y, Asahina A, Imafuku S *et al.* Efficacy and safety of certolizumab pegol in Japanese patients with moderate to severe plaque psoriasis: 52-week results. *Dermatol Ther (Heidelb)* 2021; **11**:943–60.
- 250 Umezawa Y, Nakagawa H, Sakurai S *et al.* Certolizumab pegol for the treatment of moderate to severe plaque psoriasis: 16-week results from a phase 2/3 Japanese study. *Dermatol Ther (Heidelb)* 2021; **11**:513–28.
- 251 Valenzuela F, Paul C, Mallbris L *et al.* Tofacitinib versus etanercept or placebo in patients with moderate to severe chronic plaque psoriasis: patient-reported outcomes from a phase 3 study. *J Eur Acad Dermatol Venereol* 2016; **30**:1753–9.
- 252 van de Kerkhof PCM, Loewe R, Mrowietz U *et al.* Quality of life outcomes in adults with moderate-to-severe plaque psoriasis treated with dimethylfumarate (DMF): a post hoc analysis of the BRIDGE study. *J Eur Acad Dermatol Venereol* 2020; **34**:119–26.
- 253 Van Voorhees AS, Stein Gold L, Lebwohl M *et al.* Efficacy and safety of apremilast in patients with moderate to severe plaque psoriasis of the scalp: results of a phase 3b, multicenter, randomized, placebo-controlled, double-blind study. *J Am Acad Dermatol* 2020; **83**:96–103.
- 254 Viswanathan HN, Chau D, Milmont CE *et al.* Total skin clearance results in improvements in health-related quality of life and reduced symptom severity among patients with moderate to severe psoriasis. *J Dermatolog Treat* 2015; **26**:235–9.
- 255 Walsh JA, Jones H, Mallbris L *et al.* The Physician Global Assessment and Body Surface Area composite tool is a simple alternative to the Psoriasis Area and Severity Index for assessment of psoriasis: post hoc analysis from PRISTINE and PRESTA. *Psoriasis (Auckl)* 2018; **8**:65–74.
- 256 Warren RB, Barker JNWB, Finlay AY *et al.* Secukinumab for patients failing previous tumour necrosis factor- $\alpha$  inhibitor therapy: results of a randomized open-label study (SIGNATURE). *Br J Dermatol* 2020; **183**:60–70.
- 257 Warren RB, Blauvelt A, Bagel J *et al.* Bimekizumab versus adalimumab in plaque psoriasis. *N Engl J Med* 2021; **385**:130–41.
- 258 Warren RB, Gold M, Gooderham M *et al.* Four-week daily calcipotriene/betamethasone dipropionate foam is highly efficacious in patients with psoriasis (PSO-LONG lead-in phase). *J Drugs Dermatol* 2021; **20**:436–41.
- 259 Warren RB, Hansen JB, Reich K *et al.* Complete clearance and Psoriasis Area and Severity Index response for brodalumab and ustekinumab in AMAGINE-2 and -3. *J Eur Acad Dermatol Venereol* 2021; **35**:450–7.
- 260 Warren RB, Mrowietz U, von Kiedrowski R *et al.* An intensified dosing schedule of subcutaneous methotrexate in patients with moderate to severe plaque-type psoriasis (METOP): a 52 week, multicentre, randomised, double-blind, placebo-controlled, phase 3 trial. *Lancet* 2017; **389**:528–37.
- 261 Wu JJ, Lin C, Sun L *et al.* Minimal clinically important difference (MCID) for work productivity and activity impairment (WPAI) questionnaire in psoriasis patients. *J Eur Acad Dermatol Venereol* 2019; **33**:318–24.
- 262 Yang H-Z, Wang K, Jin H-Z *et al.* Infliximab monotherapy for Chinese patients with moderate to severe plaque psoriasis: a randomized, double-blind, placebo-controlled multicenter trial. *Chinese Med J* 2012; **125**:1845–51.
- 263 Yao D-N, Lu C-J, Wen Z-H *et al.* Oral PSORI-CM01, a Chinese herbal formula, plus topical sequential therapy for moderate-to-severe psoriasis vulgaris: pilot study for a double-blind, randomized, placebo-controlled trial. *Trials* 2016; **17**:140.
- 264 Yao DN, Lu CJ, Wen ZH *et al.* Comparison of PSORI-CM01 granules and Yinxieling tablets for patients with chronic plaque psoriasis: a pilot study for a randomized, double-blinded, double-dummy, multicentre trial. *Ann Palliat Med* 2021; **10**:2036–47.
- 265 Yargholi A, Shirbeigi L, Rahimi R *et al.* The effect of *Melissa officinalis* syrup on patients with mild to moderate psoriasis: a randomized, double-blind placebo-controlled clinical trial. *BMC Res Notes* 2021; **14**:253.
- 266 Yosipovitch G, Foley P, Ryan C *et al.* Ixekizumab improved patient-reported genital psoriasis symptoms and impact of symptoms on sexual activity vs placebo in a randomized, double-blind study. *J Sex Med* 2018; **15**:1645–52.
- 267 Yosipovitch G, Reich A, Steinhoff M *et al.* Impact of ixekizumab treatment on itch and Psoriasis Area and Severity Index in patients with moderate-to-severe plaque psoriasis: an integrated analysis of two phase III randomized studies. *Dermatol Ther (Heidelb)* 2018; **8**:621–37.
- 268 Yousefzadeh H, Rastin M, Mahmoudi M *et al.* Clinical efficacy and quality of life under micronutrients in combination with methotrexate therapy in chronic plaque of psoriatic patients. *Dermatol Sin* 2017; **35**:187–94.
- 269 Yu Q, Tong Y, Cui L *et al.* Efficacy and safety of etanercept combined plus methotrexate and comparison of expression of pro-inflammatory factors expression for the treatment of moderate-to-severe plaque psoriasis. *Int Immunopharmacol* 2019; **73**:442–50.
- 270 Zachariae C, Gordon K, Kimball AB *et al.* Efficacy and safety of ixekizumab over 4 years of open-label treatment in a phase 2



- study in chronic plaque psoriasis. *J Am Acad Dermatol* 2018; **79**:294–301.e6.
- 271 Zhou H, Shi HJ, Yang J *et al.* Efficacy of oxymatrine for treatment and relapse suppression of severe plaque psoriasis: results from a single-blinded randomized controlled clinical trial. *Br J Dermatol* 2017; **176**:1446–55.
- 272 Zhou J, Shen Y, Zheng M *et al.* Pharmacokinetics and safety of icotinib hydrochloride cream in patients with mild to moderate chronic plaque psoriasis: a randomized double-blind vehicle-controlled phase 1 study. *Biomed Res Int* 2019; **2019**:9072683.
- 273 Zhou J, Yi X, Li Y, Ding Y. Efficacy assessment of UVA1 and narrowband UVB for treatment of scalp psoriasis. *Lasers Med Sci* 2018; **33**:1979–82.
- 274 Zhu B, Edson-Heredia E, Guo J *et al.* Itching is a significant problem and a mediator between disease severity and quality of life for patients with psoriasis: results from a randomized controlled trial. *Br J Dermatol* 2014; **171**:1215–19.
- 275 Zhu X, Zheng M, Song M *et al.* Efficacy and safety of ustekinumab in Chinese patients with moderate to severe plaque-type psoriasis: results from a phase 3 clinical trial (LOTUS). *J Drugs Dermatol* 2013; **12**:166–74.
- 276 Stein Gold L, Bagel J, Lebwohl M *et al.* Efficacy and safety of apremilast in systemic- and biologic-naïve patients with moderate plaque psoriasis: 52-week results of UNVEIL. *J Drugs Dermatol* 2018; **17**:221–8.
- 277 Alexis AF, Rendon M, Silverberg JI *et al.* Efficacy of dupilumab in different racial subgroups of adults with moderate-to-severe atopic dermatitis in three randomized, placebo-controlled phase 3 trials. *J Drugs Dermatol* 2019; **18**:804–13.
- 278 Liu L, Chen J, Xu J *et al.* Sublingual immunotherapy of atopic dermatitis in mite-sensitized patients: a multi-centre, randomized, double-blind, placebo-controlled study. *Artif Cells Nanomed Biotechnol* 2019; **47**:3540–7.
- 279 Cork MJ, Eckert L, Simpson EL *et al.* Dupilumab improves patient-reported symptoms of atopic dermatitis, symptoms of anxiety and depression, and health-related quality of life in moderate-to-severe atopic dermatitis: analysis of pooled data from the randomized trials SOLO 1 and SOLO 2. *J Dermatolog Treat* 2020; **31**:606–14.
- 280 Dey S, Shaikh AR, Saha S *et al.* Efficacy of individualized homeopathic medicines in the treatment of atopic dermatitis in adults: a double-blind, randomized, placebo-controlled, preliminary trial. *Complement Med Res* 2022; **29**:17–26.
- 281 Drago L, Iemoli E, Rodighiero V *et al.* Effects of *Lactobacillus salivarius* LS01 (DSM 22775) treatment on adult atopic dermatitis: a randomized placebo-controlled study. *Int J Immunopathol Pharmacol* 2011; **24**:1037–48.
- 282 Fang Z, Lu W, Zhao J *et al.* Probiotics modulate the gut microbiota composition and immune responses in patients with atopic dermatitis: a pilot study. *Eur J Nutr* 2020; **59**:2119–30.
- 283 Griffiths C, de Bruin-Weller M, Deleuran M *et al.* Dupilumab in adults with moderate-to-severe atopic dermatitis and prior use of systemic non-steroidal immunosuppressants: analysis of four phase 3 trials. *Dermatol Ther (Heidelb)* 2021; **11**:1357–72.
- 284 Guttman-Yassky E, Blauvelt A, Eichenfield LF *et al.* Efficacy and safety of lebrikizumab, a high-affinity interleukin 13 inhibitor, in adults with moderate to severe atopic dermatitis: a phase 2b randomized clinical trial. *JAMA Dermatol* 2020; **156**:411–20.
- 285 Heratizadeh A, Werfel T, Wasmann-Otto A *et al.* Effects of structured patient education in adults with atopic dermatitis: multicenter randomized controlled trial. *J Allergy Clin Immunol* 2017; **140**:845.
- 286 Joergensen KM, Vestergaard C, Joergensen MS *et al.* Memory buttons in combination with mobile application-induced objective and subjective effects in patients with atopic dermatitis. *Dermatol Res Pract* 2020; **2020**:8915893.
- 287 Joly P, Tejedor I, Tetart F *et al.* Tacrolimus 0.1% versus ciclopiroxolamine 1% for maintenance therapy in patients with severe facial seborrheic dermatitis: a multicenter, double-blind, randomized controlled study. *J Am Acad Dermatol* 2021; **84**:1278–84.
- 288 Kang S, Kim Y-K, Yeom M *et al.* Acupuncture improves symptoms in patients with mild-to-moderate atopic dermatitis: a randomized, sham-controlled preliminary trial. *Complement Ther Med* 2018; **41**:90–8.
- 289 Martin BA, Lemos CN, Dalmolin LF *et al.* A new approach to atopic dermatitis control with low-concentration propolis-loaded cold cream. *Pharmaceutics* 2021; **13**:1346.
- 290 Mihara R, Nakano M, Kabashima K *et al.* Nemolizumab in moderate to severe atopic dermatitis: an exploratory analysis of work productivity and activity impairment in a randomized phase II study. *J Dermatol* 2019; **46**:662–71.
- 291 Saeki H, Kabashima K, Tokura Y *et al.* Efficacy and safety of ustekinumab in Japanese patients with severe atopic dermatitis: a randomized, double-blind, placebo-controlled, phase II study. *Br J Dermatol* 2017; **177**:419–27.
- 292 Silverberg JI, Guttman-Yassky E, Gooderham M *et al.* Health-related quality of life with tralokinumab in moderate-to-severe atopic dermatitis: a phase 2b randomized study. *Ann Allergy Asthma Immunol* 2021; **126**:576–83.e4.
- 293 Silverberg JI, Simpson EL, Ardeleanu M *et al.* Dupilumab provides important clinical benefits to patients with atopic dermatitis who do not achieve clear or almost clear skin according to the Investigator's Global Assessment: a pooled analysis of data from two phase III trials. *Br J Dermatol* 2019; **181**:80–7.
- 294 Silverberg JI, Simpson EL, Boguniewicz M *et al.* Dupilumab provides rapid and sustained clinically meaningful responses in adults with moderate-to-severe atopic dermatitis. *Acta Derm Venereol* 2021; **101**:adv00585.
- 295 Simpson EL, Flohr C, Eichenfield LF *et al.* Efficacy and safety of lebrikizumab (an anti-IL-13 monoclonal antibody) in adults with moderate-to-severe atopic dermatitis inadequately controlled by topical corticosteroids: a randomized, placebo-controlled phase II trial (TREBLE). *J Am Acad Dermatol* 2018; **78**:863.
- 296 Simpson EL, Forman S, Silverberg JI *et al.* Baricitinib in patients with moderate-to-severe atopic dermatitis: results from a randomized monotherapy phase 3 trial in the United States and Canada (BREEZE-AD5). *J Am Acad Dermatol* 2021; **85**:62–70.
- 297 Simpson EL, Gadkari A, Worm M *et al.* Dupilumab therapy provides clinically meaningful improvement in patient-reported outcomes (PROs): a phase IIb, randomized, placebo-controlled, clinical trial in adult patients with moderate to severe atopic dermatitis (AD). *J Am Acad Dermatol* 2016; **75**:506–15.
- 298 Simpson EL, Wollenberg A, Bissonnette R *et al.* Patient-reported symptoms and disease impacts in adults with moderate-to-severe atopic dermatitis: results from a phase 2b study with abrocitinib. *Dermatitis* 2021; **32**:S53–61.
- 299 Thyssen JP, Buhl T, Fernandez-Penas P *et al.* Baricitinib rapidly improves skin pain resulting in improved quality of life for patients with atopic dermatitis: analyses from BREEZE-AD1, 2, and 7. *Dermatol Ther (Heidelb)* 2021; **11**:1599–611.
- 300 Wollenberg A, Blauvelt A, Guttman-Yassky E *et al.* Tralokinumab for moderate-to-severe atopic dermatitis: results from two 52-week, randomized, double-blind, multicentre, placebo-controlled phase III trials (ECZTRA 1 and ECZTRA 2). *Br J Dermatol* 2021; **184**:437–49.
- 301 Wollenberg A, Howell MD, Guttman-Yassky E *et al.* Treatment of atopic dermatitis with tralokinumab, an anti-IL-13 mAb. *J Allergy Clin Immunol* 2019; **143**:135–41.
- 302 Wollenberg A, Nakahara T, Maari C *et al.* Impact of baricitinib in combination with topical steroids on atopic dermatitis symptoms, quality of life and functioning in adult patients with moderate-to-severe atopic dermatitis from the BREEZE-AD7

- phase 3 randomized trial. *J Eur Acad Dermatol Venereol* 2021; **35**:1543–52.
- 303 Atefi N, Sharifi S, Ghassemi M *et al.* Probiotic as an adjuvant therapy in chronic urticaria: a blinded randomized controlled clinical trial. *Eur Ann Allergy Clin Immunol* 2021; **54**:123–30.
- 304 Boonpiyathad T, Sangasapaviliya A. Hydroxychloroquine in the treatment of anti-histamine refractory chronic spontaneous urticaria, randomized single-blinded placebo-controlled trial and an open label comparison study. *Eur Ann Allergy Clin Immunol* 2017; **49**:220–4.
- 305 Ma B, Chen X, Liang Y *et al.* Efficacy of bloodletting therapy in patients with chronic idiopathic urticaria: a randomized control trial. *Evid Based Complement Alternat Med* 2020; **2020**:6598708.
- 306 Datta A, Chandra S, Saha A *et al.* Exploring the safety and effectiveness of subcutaneous autologous serum therapy versus conventional intramuscular autologous serum therapy in chronic urticaria: an observer-blind, randomized, controlled study. *Indian J Dermatol Venereol Leprol* 2020; **86**:632–42.
- 307 Debbarman P, Bandyopadhyay D, Das NK *et al.* Autologous serum therapy in chronic urticaria: a promising complement to antihistamines. *Indian J Dermatol* 2014; **59**:375–82.
- 308 Godse KV, Nadkarni N, Patil S *et al.* Subcutaneous autologous serum therapy in chronic spontaneous urticaria. *Indian J Dermatol* 2017; **62**:505–7.
- 309 Grob JJ, Auquier P, Dreyfus I *et al.* Quality of life in adults with chronic idiopathic urticaria receiving desloratadine: a randomized, double-blind, multicentre, placebo-controlled study. *J Eur Acad Dermatol Venereol* 2008; **22**:87–93.
- 310 Grob JJ, Auquier P, Dreyfus I *et al.* How to prescribe antihistamines for chronic idiopathic urticaria: desloratadine daily vs PRN and quality of life. *Allergy* 2009; **64**:605–12.
- 311 Hide M, Yagami A, Togawa M *et al.* Efficacy and safety of bilastine in Japanese patients with chronic spontaneous urticaria: a multicenter, randomized, double-blind, placebo-controlled, parallel-group phase II/III study. *Allergol Int* 2017; **66**:317–25.
- 312 Kapp A, Pichler WJ. Levocetirizine is an effective treatment in patients suffering from chronic idiopathic urticaria: a randomized, double-blind, placebo-controlled, parallel, multicenter study. *Int J Dermatol* 2006; **45**:469–74.
- 313 Kocaturk E, Aktas S, Turkoglu Z *et al.* Autologous whole blood and autologous serum injections are equally effective as placebo injections in reducing disease activity in patients with chronic spontaneous urticaria: a placebo controlled, randomized, single-blind study. *J Dermatolog Treat* 2012; **23**:465–71.
- 314 Maul J-T, Distler M, Kolios A *et al.* Canakinumab lacks efficacy in treating adult patients with moderate to severe chronic spontaneous urticaria in a phase II randomized double-blind placebo-controlled single-center study. *J Allergy Clin Immunol Pract* 2021; **9**:463–8.
- 315 Podder I, Das A, Ghosh S *et al.* Effectiveness, safety, and tolerability of bilastine 20 mg vs levocetirizine 5 mg for the treatment of chronic spontaneous urticaria: a double-blind, parallel group, randomized controlled trial. *Dermatol Ther* 2020; **33**:e13946.
- 316 Sarkar T, Das N, Sil A *et al.* Effectiveness and safety of levocetirizine 10 mg versus a combination of levocetirizine 5 mg and montelukast 10 mg in chronic urticaria resistant to levocetirizine 5 mg: a double-blind, randomized, controlled trial. *Indian J Dermatol Venereol Leprol* 2017; **83**:561–8.
- 317 Staubach P, Metz M, Chapman-Rothe N *et al.* Omalizumab rapidly improves angioedema-related quality of life in adult patients with chronic spontaneous urticaria: X-ACT study data. *Allergy* 2018; **73**:576–84.
- 318 Staubach P, Metz M, Chapman-Rothe N *et al.* Effect of omalizumab on angioedema in H1-antihistamine-resistant chronic spontaneous urticaria patients: results from X-ACT, a randomized controlled trial. *Allergy* 2016; **71**:1135–44.
- 319 Sussman G, Hebert J, Gulliver W *et al.* Omalizumab re-treatment and step-up in patients with chronic spontaneous urticaria: OPTIMA trial. *J Allergy Clin Immunol Pract* 2020; **8**:2372.
- 320 Yang S-H, Lin Y-H, Chen H-Y *et al.* The efficacy and safety of a fixed combination of Chinese herbal medicine in chronic urticaria: a randomized, double-blind, placebo-controlled pilot study. *Front Pharmacol* 2018; **9**:1474.
- 321 Zuberbier T, Oanta A, Bogacka E *et al.* Comparison of the efficacy and safety of bilastine 20 mg vs levocetirizine 5 mg for the treatment of chronic idiopathic urticaria: a multi-centre, double-blind, randomized, placebo-controlled study. *Allergy* 2010; **65**:516–28.
- 322 Oliver ET, Chichester K, Devine K *et al.* Effects of an oral CRTh2 antagonist (AZD1981) on eosinophil activity and symptoms in chronic spontaneous urticaria. *Int Arch Allergy Immunol* 2019; **179**:21–30.
- 323 Brass D, Fouweather T, Stocken DD *et al.* An observer-blinded randomized controlled pilot trial comparing localized immersion psoralen-ultraviolet A with localized narrowband ultraviolet B for the treatment of palmar hand eczema. *Br J Dermatol* 2018; **179**:63–71.
- 324 Farahani AM, Aryanian Z, Memariani Z *et al.* A comparison of the effect of topical preparation of *Sambucus ebulus* L. and hydrocortisone on hand eczema: a double-blind randomized controlled trial. *J Altern Complement Med* 2021; **27**:323–30.
- 325 Graversgaard C, Ibler KS, Agner T *et al.* A long-term follow-up study of the Hand Eczema Trial (HET): a randomized clinical trial of a secondary preventive programme introduced to Danish healthcare workers. *Contact Dermatitis* 2018; **78**:329–34.
- 326 Huang D, Chen K, Zhang F-R *et al.* Efficacy and safety of Run Zao Zhi Yang capsule on chronic eczema: a multiple-center, randomized, double-blind, placebo-controlled clinical study. *J Dermatolog Treat* 2019; **30**:677–84.
- 327 Ibler KS, Jemec GB, Diepgen TL *et al.* Skin care education and individual counselling versus treatment as usual in healthcare workers with hand eczema: randomised clinical trial. *BMJ* 2012; **345**:e7822.
- 328 Lodén M, Wirén K, Smerud K *et al.* Treatment with a barrier-strengthening moisturizer prevents relapse of hand-eczema. An open, randomized, prospective, parallel group study. *Acta Derm Venereol* 2010; **90**:602–6.
- 329 Lodén M, Wirén K, Smerud KT *et al.* The effect of a corticosteroid cream and a barrier-strengthening moisturizer in hand eczema. A double-blind, randomized, prospective, parallel group clinical trial. *J Eur Acad Dermatol Venereol* 2012; **26**:597–601.
- 330 Ma T, Chai Y, Li S *et al.* Efficacy and safety of Qinzhuiliangxue decoction for treating atopic eczema: a randomized controlled trial. *Ann Palliat Med* 2020; **9**:870–82.
- 331 Mehrpooya M, Ghaed-Amini F, Firozian F *et al.* Beneficial effects of adding topical atorvastatin 5% cream to topical betamethasone 1% ointment on chronic hand eczema. *Arch Iran Med* 2020; **23**:605–13.
- 332 Mollerup A, Johansen JD, Harboe G. User evaluation of patient counselling, combining nurse consultation and eHealth in hand eczema. *Contact Dermatitis* 2016; **74**:205–16.
- 333 Schmitt J, Schakel K, Folster-Holst R *et al.* Prednisolone vs. ciclosporin for severe adult eczema. An investigator-initiated double-blind placebo-controlled multicentre trial. *Br J Dermatol* 2010; **162**:661–8.
- 334 Sobhan M, Hojati M, Vafaie S-Y *et al.* The efficacy of colloidal oatmeal cream 1% as add-on therapy in the management of chronic irritant hand eczema: a double-blind study. *Clin Cosmet Investig Dermatol* 2020; **13**:241–51.
- 335 Spada F, Harrison IP, Barnes TM *et al.* A daily regimen of a ceramide-dominant moisturizing cream and cleanser restores the skin permeability barrier in adults with moderate eczema: a randomized trial. *Dermatol Ther* 2021; **34**:e14970.

- 336 van Coevorden AM, van Sonderen E, Bouma J *et al.* Assessment of severity of hand eczema: discrepancies between patient- and physician-rated scores. *Br J Dermatol* 2006; **155**:1217–22.
- 337 Waked IS, Ibrahim ZM. Beneficial effects of paraffin bath therapy as additional treatment of chronic hand eczema: a randomized, single-blind, active-controlled, parallel-group study. *J Altern Complement Med* 2020; **26**:1144–50.
- 338 Yousefi M, Barikbin B, Kamalinejad M *et al.* Comparison of therapeutic effect of topical Nigella with betamethasone and eucerin in hand eczema. *J Eur Acad Dermatol Venereol* 2013; **27**:1498–504.
- 339 Gladman D, Fleischmann R, Coteur G *et al.* Effect of certolizumab pegol on multiple facets of psoriatic arthritis as reported by patients: 24-week patient-reported outcome results of a phase III, multicenter study. *Arthritis Care Res (Hoboken)* 2014; **66**:1085–92.
- 340 Gladman DD, Mease PJ, Cifaldi MA *et al.* Adalimumab improves joint-related and skin-related functional impairment in patients with psoriatic arthritis: patient-reported outcomes of the Adalimumab Effectiveness in Psoriatic Arthritis Trial. *Ann Rheum Dis* 2007; **66**:163–8.
- 341 Gottlieb AB, Strand V, Kishimoto M *et al.* Ixekizumab improves patient-reported outcomes up to 52 weeks in bDMARD-naïve patients with active psoriatic arthritis (SPIRIT-P1). *Rheumatology (Oxford)* 2018; **57**:1777–88.
- 342 Kavanaugh A, Marzo-Ortega H, Vender R *et al.* Ixekizumab improves patient-reported outcomes in patients with active psoriatic arthritis and inadequate response to tumour necrosis factor inhibitors: SPIRIT-P2 results to 52 weeks. *Clin Exp Rheumatol* 2019; **37**:566–74.
- 343 Kavanaugh A, Menter A, Mendelsohn A *et al.* Effect of ustekinumab on physical function and health-related quality of life in patients with psoriatic arthritis: a randomized, placebo-controlled, phase II trial. *Curr Med Res Opin* 2010; **26**:2385–92.
- 344 Mease P, Elaine Husni M, Chakravarty SD *et al.* Evaluation of improvement in skin and nail psoriasis in bio-naïve patients with active psoriatic arthritis treated with golimumab: results through week 52 of the GO-VIBRANT study. *ACR Open Rheumatol* 2020; **2**:640–7.
- 345 Mease PJ, Gottlieb AB, Berman A *et al.* The efficacy and safety of clazakizumab, an anti-interleukin-6 monoclonal antibody, in a phase IIb study of adults with active psoriatic arthritis. *Arthritis Rheumatol* 2016; **68**:2163–73.
- 346 Mease PJ, Gottlieb AB, Van Der Heijde D *et al.* Efficacy and safety of abatacept, a T-cell modulator, in a randomized, double-blind, placebo-controlled, phase III study in psoriatic arthritis. *Ann Rheum Dis* 2017; **76**:1550–8.
- 347 Merola JF, Papp KA, Nash P *et al.* Tofacitinib in psoriatic arthritis patients: skin signs and symptoms and health-related quality of life from two randomized phase 3 studies. *J Eur Acad Dermatol Venereol* 2020; **34**:2809–20.
- 348 Möller I, Pérez M, Monfort J *et al.* Effectiveness of chondroitin sulphate in patients with concomitant knee osteoarthritis and psoriasis: a randomized, double-blind, placebo-controlled study. *Osteoarthritis Cartilage* 2010; **18**(Suppl. 1):S32–40.
- 349 Nash P, Mease PJ, Kirkham B *et al.* Secukinumab provides sustained improvement in nail psoriasis, signs and symptoms of psoriatic arthritis and low rate of radiographic progression in patients with concomitant nail involvement: 2-year results from the phase III FUTURE 5 study. *Clin Exp Rheumatol* 2021; **40**:952–9.
- 350 Nash P, Thaci D, Behrens F *et al.* Leflunomide improves psoriasis in patients with psoriatic arthritis: an in-depth analysis of data from the TOPAS study. *Dermatology* 2006; **212**:238–49.
- 351 Paul C, van de Kerkhof P, Puig L *et al.* Influence of psoriatic arthritis on the efficacy of adalimumab and on the treatment response of other markers of psoriasis burden: subanalysis of the BELIEVE study. *Eur J Dermatol* 2012; **22**:762–9.
- 352 Rahman P, Puig L, Gottlieb AB *et al.* Ustekinumab treatment and improvement of physical function and health-related quality of life in patients with psoriatic arthritis. *Arthritis Care Res (Hoboken)* 2016; **68**:1812–22.
- 353 Strand V, Alemao E, Lehman T *et al.* Improved patient-reported outcomes in patients with psoriatic arthritis treated with abatacept: results from a phase 3 trial. *Arthritis Res Ther* 2018; **20**:269.
- 354 Strand V, Mease P, Gossec L *et al.* Secukinumab improves patient-reported outcomes in subjects with active psoriatic arthritis: results from a randomized phase III trial (FUTURE 1). *Ann Rheum Dis* 2017; **76**:203–7.
- 355 Walsh JA, Arledge T, Nurminen T *et al.* PGxBSA: a measure of psoriasis severity tested in patients with active psoriatic arthritis and treated with certolizumab pegol. *J Rheumatol* 2018; **45**:922–8.
- 356 Adams DR, Yankura JA, Fogelberg AC *et al.* Treatment of hidradenitis suppurativa with etanercept injection. *Arch Dermatol* 2010; **146**:501–4.
- 357 Grimstad O, Kvammen BO, Swartling C. Botulinum toxin type B for hidradenitis suppurativa: a randomized, double-blind, placebo-controlled pilot study. *Am J Clin Dermatol* 2020; **21**:741–8.
- 358 Kanni T, Argyropoulou M, Spyridopoulos T *et al.* MABp1 targeting IL-1 $\alpha$  for moderate to severe hidradenitis suppurativa not eligible for adalimumab: a randomized study. *J Invest Dermatol* 2018; **138**:795–801.
- 359 Lindso Andersen P, Riis PT, Thorlacius L *et al.* Intense pulsed light treatment for hidradenitis suppurativa: a within-person randomized controlled trial. *Eur J Dermatol* 2020; **30**:723–9.
- 360 Miller I, Lynggaard CD, Lophaven S *et al.* A double-blind placebo-controlled randomized trial of adalimumab in the treatment of hidradenitis suppurativa. *Br J Dermatol* 2011; **165**:391–8.
- 361 Schultheis M, Staubach P, Nikolakis G *et al.* LAight<sup>®</sup> therapy significantly enhances treatment efficacy of 16 weeks of topical clindamycin solution in Hurley I and II hidradenitis suppurativa: results from period A of RELIEVE, a multicenter randomized, controlled trial. *Dermatology* 2022; **238**:476–86.
- 362 Vossen ARJV, van Doorn MBA, van der Zee HH *et al.* Apremilast for moderate hidradenitis suppurativa: results of a randomized controlled trial. *J Am Acad Dermatol* 2019; **80**:80–8.
- 363 Wilden S, Friis M, Tuettenberg A *et al.* Combined treatment of hidradenitis suppurativa with intense pulsed light (IPL) and radiofrequency (RF). *J Dermatolog Treat* 2021; **32**:530–7.
- 364 Yildiz H, Senol L, Ercan E *et al.* A prospective randomized controlled trial assessing the efficacy of adjunctive hyperbaric oxygen therapy in the treatment of hidradenitis suppurativa. *Int J Dermatol* 2016; **55**:232–7.
- 365 Zouboulis CC, Okun MM, Prens EP *et al.* Long-term adalimumab efficacy in patients with moderate-to-severe hidradenitis suppurativa/acne inversa: 3-year results of a phase 3 open-label extension study. *J Am Acad Dermatol* 2018; **80**:60–9.
- 366 Jurairattanaporn N, Chalermchai T, Ophaswongse S, Udompataikul M. Comparative trial of silver nanoparticle gel and 1% clindamycin gel when use in combination with 2.5% benzoyl peroxide in patients with moderate acne vulgaris. *J Med Assoc Thai* 2017; **100**:78–85.
- 367 Lekakh O, Mahoney AM, Novice K *et al.* Treatment of acne vulgaris with salicylic acid chemical peel and pulsed dye laser: a split face, rater-blinded, randomized controlled trial. *J Lasers Med Sci* 2015; **6**:167–70.
- 368 Li Y, Zhu J, Zhang Y *et al.* Isotretinoin plus 420 nm intense pulsed light versus isotretinoin alone for the treatment of acne vulgaris: a randomized, controlled study of efficacy, safety, and patient satisfaction in Chinese subjects. *Lasers Med Sci* 2021; **36**:657–65.
- 369 Lubtikulthum P, Kamanamool N, Udompataikul M. A comparative study on the effectiveness of herbal extracts vs 2.5%



- benzoyl peroxide in the treatment of mild to moderate acne vulgaris. *J Cosmet Dermatol* 2019; **18**:1767–75.
- 370 Mohamed MM, Sabry HH, Salem RM. Treatment of atrophic acne scars: topical or intralesional plasma gel? *Photodermatol Photoimmunol Photomed* 2021; **38**:29–37.
- 371 Pakla-Misiur A, Grochowicz M, Lesiak A *et al.* Double-blind, randomized controlled trial comparing the use of microneedling alone versus chemical peeling alone versus a combination of microneedling and chemical peeling in the treatment of atrophic post-acne scars. An assessment of clinical effectiveness and patients' quality-of-life. *Postepy Dermatol Alergol* 2021; **38**:629–35.
- 372 Porwal S, Chahar YS, Singh PK. A comparative study of combined dermaroller and platelet-rich plasma versus dermaroller alone in acne scars and assessment of quality of life before and after treatment. *Indian J Dermatol* 2018; **63**:403–8.
- 373 Rademaker M, Wishart JM, Birchall NM. Isotretinoin 5 mg daily for low-grade adult acne vulgaris – a placebo-controlled, randomized double-blind study. *J Eur Acad Dermatol Venereol* 2014; **28**:747–54.
- 374 Thielitz A, Lux A, Wiede A *et al.* A randomized investigator-blind parallel-group study to assess efficacy and safety of azelaic acid 15% gel vs. adapalene 0.1% gel in the treatment and maintenance treatment of female adult acne. *J Eur Acad Dermatol Venereol* 2015; **29**:789–96.
- 375 Yang M, Moclair B, Hatcher V *et al.* A randomized, double-blind, placebo-controlled study of a novel pantothenic acid-based dietary supplement in subjects with mild to moderate facial acne. *Dermatol Ther (Heidelb)* 2014; **4**:93–101.
- 376 Bribeche MR, Fedotov VP, Gladichev VV *et al.* Clinical and experimental assessment of the effects of a new topical treatment with praziquantel in the management of rosacea. *Int J Dermatol* 2015; **54**:481–7.
- 377 Gold LS, Kircik L, Fowler J *et al.* Efficacy and safety of ivermectin 1% cream in treatment of papulopustular rosacea: results of two randomized, double-blind, vehicle-controlled pivotal studies. *J Drugs Dermatol* 2014; **13**:316–23.
- 378 Guertler A, Jontvedt NM, Clanner-Engelshofen BM *et al.* Efficacy and safety results of micellar water, cream and serum for rosacea in comparison to a control group. *J Cosmet Dermatol* 2020; **19**:2627–33.
- 379 Schaller M, Dirschka T, Kemeny L *et al.* Superior efficacy with ivermectin 1% cream compared to metronidazole 0.75% cream contributes to a better quality of life in patients with severe papulopustular rosacea: a subanalysis of the randomized, investigator-blinded ATTRACT study. *Dermatol Ther (Heidelb)* 2016; **6**:427–36.
- 380 Schaller M, Kemeny L, Havlickova B *et al.* A randomized phase 3b/4 study to evaluate concomitant use of topical ivermectin 1% cream and doxycycline 40-mg modified-release capsules, versus topical ivermectin 1% cream and placebo in the treatment of severe rosacea. *J Am Acad Dermatol* 2020; **82**:336–43.
- 381 Campos MA, Sousa AC, Varela P *et al.* Comparative effectiveness of purpuragenic 595 nm pulsed dye laser versus sequential emission of 595 nm pulsed dye laser and 1,064 nm Nd:YAG laser: a double-blind randomized controlled study. *Acta Dermatovenerol Alp Pannonica Adriat* 2019; **28**:1–5.
- 382 Tyring S, Solomon JA, Staedtler G *et al.* Patient-reported outcomes of azelaic acid foam 15% for patients with papulopustular rosacea: secondary efficacy results from a randomized, controlled, double-blind, phase 3 trial. *Cutis* 2016; **98**:269–75.
- 383 Mrowietz U, Bachelez H, Burden AD *et al.* Secukinumab for moderate-to-severe palmoplantar pustular psoriasis: results of the 2PRECISE study. *J Am Acad Dermatol* 2019; **80**:1344–52.
- 384 Okubo Y, Morishima H, Zheng R *et al.* Sustained efficacy and safety of guselkumab in patients with palmoplantar pustulosis through 1.5 years in a randomized phase 3 study. *J Dermatol* 2021; **38**:1838–53.
- 385 Peng C, Hu Y, Chen W *et al.* A randomized prospective study of different dose regimens using the 308-nm excimer laser in the treatment of palmoplantar pustulosis. *Dermatol Ther* 2021; **34**:e15079.
- 386 Terui T, Kobayashi S, Okubo Y *et al.* Efficacy and safety of guselkumab in Japanese patients with palmoplantar pustulosis: a phase 3 randomized clinical trial. *JAMA Dermatol* 2019; **155**:1153–61.
- 387 Oppel T, Pavicic T, Kamann S *et al.* Pimecrolimus cream (1%) efficacy in perioral dermatitis – results of a randomized, double-blind, vehicle-controlled study in 40 patients. *J Eur Acad Dermatol Venereol* 2007; **21**:1175–80.
- 388 Bribeche MR, Fedotov VP, Jillella A *et al.* Topical praziquantel as a new treatment for perioral dermatitis: results of a randomized vehicle-controlled pilot study. *Clin Exp Dermatol* 2014; **39**:448–53.
- 389 Lorette G, Ermosilla V. Clinical efficacy of a new ciclopiroxolamine/zinc pyrithione shampoo in scalp seborrheic dermatitis treatment. *Eur J Dermatol* 2006; **16**:558–64.
- 390 Zhao J, Sun W, Zhang C *et al.* Comparison of different regimens of pimecrolimus 1% cream in the treatment of facial seborrheic dermatitis. *J Cosmet Dermatol* 2018; **17**:90–4.
- 391 Mason JM, Chalmers JR, Kirtschig G *et al.* Doxycycline compared with prednisolone therapy for patients with bullous pemphigoid: cost-effectiveness analysis of the BLISTER trial. *Br J Dermatol* 2018; **178**:415–23.
- 392 Allam NM. Antipruritic effect of narrow band ultraviolet B versus transcutaneous electrical nerve stimulation in lichen planus. *Int Med J* 2021; **28**:78–81.
- 393 Oliveira FAP, Santos FMMD, Dias AFMP *et al.* Cosmetic camouflage improves health-related quality of life in women with systemic lupus erythematosus and permanent skin damage: a controlled intervention study. *Lupus* 2020; **29**:1438–48.
- 394 Werth VP, Joly P, Mimouni D *et al.* Rituximab versus mycophenolate mofetil in patients with pemphigus vulgaris. *N Engl J Med* 2021; **384**:2295–305.
- 395 Pariser RJ, Paul J, Hirano S *et al.* A double-blind, randomized, placebo-controlled trial of adalimumab in the treatment of cutaneous sarcoidosis. *J Am Acad Dermatol* 2013; **68**:765–73.
- 396 Prey S, Ezzedine K, Doussau A *et al.* Imatinib mesylate in scleroderma-associated diffuse skin fibrosis: a phase II multicentre randomized double-blinded controlled trial. *Br J Dermatol* 2012; **167**:1138–44.
- 397 Hadley J, Tristani-Firouzi P, Hull C *et al.* Results of an investigator-initiated single-blind split-face comparison of photodynamic therapy and 5% imiquimod cream for the treatment of actinic keratoses. *Dermatol Surg* 2012; **38**:722–7.
- 398 Hanke WC, Norlin JM, Mark Knudsen K *et al.* Quality of life in treatment of AK: treatment burden of ingenol mebutate gel is small and short lasting. *J Dermatolog Treat* 2016; **27**:450–5.
- 399 lanhez M, Pinto SA, Miot HA *et al.* A randomized, open, controlled trial of tretinoin 0.05% cream vs. low-dose oral isotretinoin for the treatment of field cancerization. *Int J Dermatol* 2019; **58**:365–73.
- 400 Pflugfelder A, Welter AK, Leiter U *et al.* Open label randomized study comparing 3 months vs. 6 months treatment of actinic keratoses with 3% diclofenac in 2.5% hyaluronic acid gel: a trial of the German Dermatologic Cooperative Oncology Group. *J Eur Acad Dermatol Venereol* 2012; **26**:48–53.
- 401 Tao Y, Auperin A, Sire C *et al.* Multicenter randomized double-blind, placebo-controlled trial GORTEC (Groupe Oncologie Radiotherapie Tete et Cou) 2009-01 evaluating the effect of the regenerating agent on radiodermatitis of head and neck cancer patients. *Int J Radiat Oncol Biol Phys* 2017; **99**:590–5.
- 402 Wells M, Macmillan M, Raab G *et al.* Does aqueous or sucral-fate cream affect the severity of erythematous radiation skin reactions? A randomised controlled trial. *Radiother Oncol* 2004; **73**:153–62.

- 403 Hindley A, Zain Z, Wood L *et al.* Mometasone furoate cream reduces acute radiation dermatitis in patients receiving breast radiation therapy: results of a randomized trial. *Int J Radiat Oncol Biol Phys* 2014; **90**:748–55.
- 404 Wohlrab J, Bangemann N, Kleine-Tebbe A *et al.* Barrier protective use of skin care to prevent chemotherapy-induced cutaneous symptoms and to maintain quality of life in patients with breast cancer. *Breast Cancer (Dove Med Press)* 2014; **6**:115–22.
- 405 Kripp M, Prasnikar N, Vehling-Kaiser U *et al.* AIO LQ-0110: a randomized phase II trial comparing oral doxycycline versus local administration of erythromycin as preemptive treatment strategies of panitumumab-mediated skin toxicity in patients with metastatic colorectal cancer. *Oncotarget* 2017; **8**:105061–71.
- 406 Huang C, Yan S, Ren J *et al.* A quantitative assessment of the effects of formal sun protection education on photosensitive patients. *Photodermatol Photoimmunol Photomed* 2013; **29**:261–5.
- 407 Panahi Y, Sahebkar A, Davoudi SM *et al.* Efficacy and safety of immunotherapy with interferon-gamma in the management of chronic sulfur mustard-induced cutaneous complications: comparison with topical betamethasone 1%. *Sci World J* 2012; **2012**:285274.
- 408 Koh J, Takahashi M, Sakata M *et al.* Preventive effect of a heparinoid-containing product on the application site reaction of the rotigotine transdermal patch in Parkinson's disease: a pilot randomized clinical trial (the SkinHeRo study). *Clin Park Relat Disord* 2021; **5**:100105.
- 409 Byth LA, Byth J. Topical simvastatin-cholesterol for disseminated superficial actinic porokeratosis: an open-label, split-body clinical trial. *Australas J Dermatol* 2021; **62**:310–13.
- 410 Deplanque G, Gervais R, Vergnenegre A *et al.* Doxycycline for prevention of erlotinib-induced rash in patients with non-small-cell lung cancer (NSCLC) after failure of first-line chemotherapy: a randomized, open-label trial. *J Am Acad Dermatol* 2016; **74**:1077–85.
- 411 Stanley Xavier A, Selvarajan S, Chandrasekar L, Kamalanathan S. Effect of cholecalciferol supplementation on treatment response and IL-10 level in vitamin D deficient parthenium dermatitis patients: a randomized double-blind placebo-controlled trial. *J Diet Suppl* 2020; **17**:415–28.
- 412 Bagatin E, Guadanhim LRS, Enokihara MMSS *et al.* Low-dose oral isotretinoin versus topical retinoic acid for photoaging: a randomized, comparative study. *Int J Dermatol* 2014; **53**:114–22.
- 413 Franken SM, Genders RE, de Gruijl FR *et al.* Skin hardening effect in patients with polymorphic light eruption: comparison of UVB hardening in hospital with a novel home UV-hardening device. *J Eur Acad Dermatol Venereol* 2013; **27**:67–72.
- 414 Krause K, Tsianakas A, Wagner N *et al.* Efficacy and safety of canakinumab in Schnitzler syndrome: a multicenter randomized placebo-controlled study. *J Allergy Clin Immunol* 2017; **139**:1311–20.
- 415 Naik HB, Steinberg SM, Middleton LA *et al.* Efficacy of intralésional botulinum toxin A for treatment of painful cutaneous leiomyomas: a randomized clinical trial. *JAMA Dermatol* 2015; **151**:1096–102.
- 416 Lacouture ME, Mitchell EP, Piperdi B *et al.* Skin toxicity evaluation protocol with panitumumab (STEPP), a phase II, open-label, randomized trial evaluating the impact of a pre-emptive skin treatment regimen on skin toxicities and quality of life in patients with metastatic colorectal cancer. *J Clin Oncol* 2010; **28**:1351–7.
- 417 Peeters M, Siena S, Van Cutsem E *et al.* Association of progression-free survival, overall survival, and patient-reported outcomes by skin toxicity and KRAS status in patients receiving panitumumab monotherapy. *Cancer* 2009; **115**:1544–54.
- 418 Rees J, Hurt CN, Gollins S *et al.* Patient-reported outcomes during and after definitive chemoradiotherapy for oesophageal cancer. *Br J Cancer* 2015; **113**:603–10.
- 419 Dalenc F, Ribet V, Rossi AB *et al.* Efficacy of a global supportive skin care programme with hydrotherapy after non-metastatic breast cancer treatment: a randomised, controlled study. *Eur J Cancer Care (Engl)* 2018; **27**:ecc.12735.
- 420 Reyna-Rodriguez IL, Chavez-Alvarez S, Garza-Rodriguez V *et al.* Cryotherapy plus low-dose oral isotretinoin vs cryotherapy only for the treatment of anogenital warts: a randomized clinical trial. *Arch Dermatol Res* 2021; **313**:815–27.
- 421 Chandra S, Datta A, Sil A *et al.* A double-blind, randomized controlled trial to compare the effectiveness and safety of purified protein derivative of tuberculin antigen with *Mycobacterium w* vaccine in the treatment of multiple viral warts. *Indian J Dermatol Venereol Leprol* 2019; **85**:355–66.
- 422 Dey S, Hashmi S, Saha S *et al.* A randomized, double-blind, placebo-controlled, pilot trial of individualized homeopathic medicines for cutaneous warts. *Homeopathy* 2021; **110**:149–59.
- 423 Yu R, Wu X, Jia L, Lou Y. Effect of Chinese herbal compound LC09 on patients with capecitabine-associated hand-foot syndrome: a randomized, double-blind, and parallel-controlled trial. *Integr Cancer Ther* 2020; **19**:1534735420928466.
- 424 Lee EG, Lee HJ, Hyun DJ *et al.* Efficacy of low dose gabapentin in acute herpes zoster for preventing postherpetic neuralgia: a prospective controlled study. *Dermatol Ther* 2016; **29**:184–90.
- 425 Singh M, Pawar M. Efficacy of topical insulin therapy for chronic trophic ulcers in patients with leprosy: a randomized interventional pilot study. *Adv Skin Wound Care* 2020; **33**:1–6.
- 426 Das A, Sil A, Sarkar TK *et al.* A randomized, double-blind trial of amorolfine 0.25% cream and sertaconazole 2% cream in limited dermatophytosis. *Indian J Dermatol Venereol Leprol* 2019; **85**:276–81.
- 427 Polat AK, Belli AA, Alatas ET *et al.* Comparison of efficacy and safety of topical 1% butenafine and topical 1% ciclopiroxolamine in the treatment of tinea pedis and evaluation of the effects on the quality of life of these treatments: a randomized single-blind trial. *Turk Dermatoloji Dergisi* 2017; **11**:174–8.
- 428 Zakeri S, Esmailzadeh S, Gorji N *et al.* The effect of *Achillea millefolium* L. on vulvovaginal candidiasis compared with clotrimazole: a randomized controlled trial. *Complement Ther Med* 2020; **52**:102483.
- 429 Al-Ghnamien R, Short K, Pullen A *et al.* 1% hydrocortisone ointment is an effective treatment of pruritus ani: a pilot randomized controlled crossover trial. *Int J Colorectal Dis* 2007; **22**:1463.
- 430 Foroutan N, Etminan A, Nikvarz N, Shojai Shahrokh Abadi M. Comparison of pregabalin with doxepin in the management of uremic pruritus: a randomized single blind clinical trial. *Hemodial Int* 2017; **21**:63–71.
- 431 Maul JT, Kretschmer L, Anzengruber F *et al.* Impact of UVA on pruritus during UVA/B phototherapy of inflammatory skin diseases: a randomized double-blind study. *J Eur Acad Dermatol Venereol* 2017; **31**:1208–13.
- 432 Mrowietz U, Chouela EN, Mallbris L *et al.* Pruritus and quality of life in moderate-to-severe plaque psoriasis: post hoc explorative analysis from the PRISTINE study. *J Eur Acad Dermatol Venereol* 2015; **29**:1114–20.
- 433 Panahi Y, Davoudi SM, Beiraghdar F *et al.* Doxepin cream vs betamethasone cream for treatment of chronic skin lesions due to sulfur mustard. *Skinmed* 2011; **9**:152–8.
- 434 Panahi Y, Sahebkar A, Amir M *et al.* Improvement of sulphur mustard-induced chronic pruritus, quality of life and antioxidant status by curcumin: results of a randomised, double-blind, placebo-controlled trial. *Br J Nutr* 2012; **108**:1272–9.
- 435 Shohrati M, Davoud M, Rezazadeh S, Najafian B. Clinical efficacy of topical *Avena sativa* versus betamethasone in chronic pruritus due to sulfur mustard exposure. *J Med Plants* 2017; **16**:68–77.
- 436 Stander S, Heitkemper T, Augustin M *et al.* Novel TRPM8 agonist cooling compound against chronic itch: results from



- a randomized, double-blind, controlled, pilot study in dry skin. *J Eur Acad Dermatol Venereol* 2017; **31**:1064–8.
- 437 Ucak H, Demir B, Cicek D *et al.* Efficacy of topical tacrolimus for the treatment of persistent pruritus ani in patients with atopic dermatitis. *J Dermatolog Treat* 2013; **24**:454–7.
- 438 Yosipovitch G, Stander S, Kerby MB *et al.* Serlopitant for the treatment of chronic pruritus: results of a randomized, multicenter, placebo-controlled phase 2 clinical trial. *J Am Acad Dermatol* 2018; **78**:882.
- 439 Artzi O, Loizides C, Zur E *et al.* Topical oxybutynin 10% gel for the treatment of primary focal hyperhidrosis: a randomized double-blind placebo-controlled split area study. *Acta Derm Venereol* 2017; **97**:1120–4.
- 440 Kirsch B, Chadha D, Walker P *et al.* Efficacy and safety of topical sofipronium bromide gel for the treatment of axillary hyperhidrosis: a phase II, randomized, controlled, double-blinded trial. *J Am Acad Dermatol* 2020; **82**:1321–7.
- 441 Mostafa TAH, Hamed AA, Mohammed BM *et al.* C-arm guided percutaneous radiofrequency thoracic sympathectomy for treatment of primary palmar hyperhidrosis in comparison with local botulinum toxin type A injection, randomized trial. *Pain Physician* 2019; **22**:591–9.
- 442 Müller C, Berensmeier A, Hamm H *et al.* Efficacy and safety of methantheline bromide (Vagantin®) in axillary and palmar hyperhidrosis: results from a multicenter, randomized, placebo-controlled trial. *J Eur Acad Dermatol Venereol* 2013; **27**:1278–84.
- 443 Pariser DM, Krishnaraja J, Rubison RM *et al.* Randomized, placebo- and active-controlled crossover study of the safety and efficacy of THVD-102, a fixed-dose combination of oxybutynin and pilocarpine, in subjects with primary focal hyperhidrosis. *J Drugs Dermatol* 2017; **16**:127–32.
- 444 Paul A, Kranz G, Schindl A *et al.* Diode laser hair removal does not interfere with botulinum toxin A treatment against axillary hyperhidrosis. *Lasers Surg Med* 2010; **42**:211–14.
- 445 Rummaneethorn P, Chalermchai T. A comparative study between intradermal botulinum toxin A and fractional microneedle radiofrequency (FMR) for the treatment of primary axillary hyperhidrosis. *Lasers Med Sci* 2020; **35**:1179–84.
- 446 Schollhammer M, Brenaut E, Menard-Andivot N *et al.* Oxybutynin as a treatment for generalized hyperhidrosis: a randomized, placebo-controlled trial. *Br J Dermatol* 2015; **173**:1163–8.
- 447 Tedesco M, Bellei B, Garelli V *et al.* Adipose tissue stromal vascular fraction and adipose tissue stromal vascular fraction plus platelet-rich plasma grafting: new regenerative perspectives in genital lichen sclerosus. *Dermatol Ther* 2020; **33**:e14277.
- 448 Maretti C, Cavallini G. Topical application of eosin 2% with chloroxilenol 0.3%, propylene glycol 30% (neomercurocromo) and colloidal silver: a new topical treatment for lichen sclerosus. *Int J Pharma Bio Sci* 2018; **9**:P168–73.
- 449 Ioannides D, Lazaridou E, Apalla Z *et al.* Acitretin for severe lichen sclerosus of male genitalia: a randomized, placebo controlled study. *J Urol* 2010; **183**:1395–9.
- 450 Katoulis AC, Liakou AI, Alevizou A *et al.* Efficacy and safety of a topical botanical in female androgenetic alopecia: a randomized, single-blinded, vehicle-controlled study. *Skin Append Disord* 2018; **4**:160–5.
- 451 Katoulis AC, Liakou AI, Koumaki D *et al.* A randomized, single-blinded, vehicle-controlled study of a topical active blend in the treatment of androgenetic alopecia. *Dermatol Ther* 2020; **33**:e13734.
- 452 Bagatin E, Miot HA, Soares JLM *et al.* Long-wave infrared radiation reflected by compression stockings in the treatment of cellulite: a clinical double-blind, randomized and controlled study. *Int J Cosmet Sci* 2013; **35**:502–9.
- 453 Mason JM, Thomas KS, Foster KA *et al.* Prophylactic antibiotics to prevent cellulitis of the leg: economic analysis of the Patch I & II trials. *PLOS ONE* 2014; **9**:e82694.
- 454 Grant P. Spearmint herbal tea has significant anti-androgen effects in polycystic ovarian syndrome. A randomized controlled trial. *Phytother Res* 2010; **24**:186–8.
- 455 Dorgham N, Sharobim A, Haggag H *et al.* Adding combined oral contraceptives or metformin to laser treatment in polycystic ovarian syndrome hirsute patients. *J Drugs Dermatol* 2021; **20**:302–6.
- 456 Limpjaroenviriyakul N, Jurairattanaporn N, Kamanamool N *et al.* Low-fluence Q-switched Nd:YAG 1064-nm laser versus Q-switched Nd:YAG 532-nm laser in the treatment of hyperpigmented lips: a prospective, randomized, controlled, evaluator-blinded trial. *Lasers Med Sci* 2020; **35**:165–71.
- 457 Joshi SS, Boone SL, Alam M *et al.* Effectiveness, safety, and effect on quality of life of topical salicylic acid peels for treatment of postinflammatory hyperpigmentation in dark skin. *Dermatol Surg* 2009; **35**:638–44.
- 458 Gobo-Oliveira M, Pigari VG, Ogata MS *et al.* Gabapentin versus dexchlorpheniramine as treatment for uremic pruritus: a randomized controlled trial. *Eur J Dermatol* 2018; **28**:488–95.
- 459 Haber R, Bachour J, Salloum A *et al.* Comparison of gabapentin and doxepin in the management of uremic pruritus: a randomized crossover clinical trial. *Dermatol Ther* 2020; **33**:e14522.
- 460 Mir AA, Wani GN, Prajapati R *et al.* Add-on *Psoralea corylifolia* mother tincture external application to individualized homeopathic medicines in treatment of vitiligo: open, randomized, pragmatic, pilot trial. *Adv Integrat Med* 2021; **9**:53–62.
- 461 Shah R, Hunt J, Webb TL *et al.* Starting to develop self-help for social anxiety associated with vitiligo: using clinical significance to measure the potential effectiveness of enhanced psychological self-help. *Br J Dermatol* 2014; **171**:332–7.
- 462 Yoshida Y, Hirama A, Hashimoto K *et al.* Efficacy of a moisturizer for pruritus accompanied by xerosis in patients undergoing dialysis: a multicenter, open-label, randomized verification study. *J Dermatol* 2021; **48**:1327–35.
- 463 Escuadro-Chin MO, Maanō MMC, Dofitas BL. Randomized assessor-blinded controlled trial on the efficacy and safety of virgin coconut oil versus mineral oil as a therapeutic moisturizer for senile xerosis. *Acta Medica Philippina* 2019; **53**:335–43.
- 464 Hoshino T, Yamashita S-I, Suzuki N *et al.* Impact of Acacia bark extract tablets on the skin of healthy humans: a randomized, double-blind, placebo-controlled study. *Biosci Biotechnol Biochem* 2019; **83**:538–50.
- 465 Duan Y, Wang J, Surui A *et al.* Effects of TCM combined with Western medicine therapy on progressive symmetric erythrokeratoderma. *Int J Clin Exp Med* 2018; **11**:11211–16.
- 466 Evangelista MTP, Casintahan MFA, Villafuerte LL. Simvastatin as a novel therapeutic agent for venous ulcers: a randomized, double-blind, placebo-controlled trial. *Br J Dermatol* 2014; **170**:1151–7.
- 467 Hounsoume N, Kassahun MM, Ngari M *et al.* Cost-effectiveness and social outcomes of a community-based treatment for podoconiosis lymphoedema in the East Gojjam zone, Ethiopia. *PLOS Negl Trop Dis* 2019; **13**:e0007780.
- 468 Chalermchai T, Rummaneethorn P. Effects of a fractional picosecond 1,064 nm laser for the treatment of dermal and mixed type melasma. *J Cosmet Laser Ther* 2018; **20**:134–9.
- 469 Lai L, Flower A, Prescott P *et al.* Standardised versus individualised multiherb Chinese herbal medicine for oligomenorrhoea and amenorrhoea in polycystic ovary syndrome: a randomised feasibility and pilot study in the UK. *BMJ Open* 2017; **7**:e011709.
- 470 Campanati A, Consales V, Rizzetto G *et al.* Combined treatment of palmar hyperhidrosis with botulinum toxin type A and oxybutynin chloride: results of a clinical, multicenter, prospective study. *Dermatol Ther* 2020; **33**:e14039.
- 471 Budania A, Pathania YS, Lahoria U *et al.* Comparing novel versus conventional technique of platelet-rich plasma therapy in periorbital hyperpigmentation: a randomized prospective split-face study. *J Cosmet Dermatol* 2021; **20**:3245–52.

- 472 Siepmann D, Lotts T, Blome C *et al.* Evaluation of the anti-pruritic effects of topical pimecrolimus in non-atopic prurigo nodularis: results of a randomized, hydrocortisone-controlled, double-blind phase II trial. *Dermatology* 2013; **227**:353–60.
- 473 Mason JM, Thomas KS, Ormerod AD *et al.* Ciclosporin compared with prednisolone therapy for patients with pyoderma gangrenosum: cost-effectiveness analysis of the STOP GAP trial. *Br J Dermatol* 2017; **177**:1527–36.
- 474 Weiss SC, Nguyen J, Chon S *et al.* A randomized controlled clinical trial assessing the effect of betamethasone valerate 0.12% foam on the short-term treatment of stasis dermatitis. *J Drugs Dermatol* 2005; **4**:339–45.
- 475 Napolini AP, Boza JC, da Silva VD *et al.* Efficacy of microneedling versus fractional non-ablative laser to treat striae alba: a randomized study. *Am J Clin Dermatol* 2019; **20**:277–87.
- 476 Choi E, Tan KW, Tang F *et al.* Efficacy of targeted education in reducing topical steroid phobia: a randomized clinical trial. *J Am Acad Dermatol* 2020; **83**:1681–7.
- 477 Salisbury C, Noble A, Horrocks S *et al.* Evaluation of a general practitioner with special interest service for dermatology: randomised controlled trial. *BMJ* 2005; **331**:1441–6.
- 478 Ali FM, Johns N, Finlay AY *et al.* Comparison of the paper-based and electronic versions of the Dermatology Life Quality Index: evidence of equivalence. *Br J Dermatol* 2017; **177**:1306–15.
- 479 Glatt S, Seegobin S, Baeten D *et al.* Efficacy and safety of bimekizumab in moderate to severe hidradenitis suppurativa: a phase 2, double-blind, placebo-controlled randomized clinical trial. *JAMA Dermatol* 2021; **157**:1279–88.
- 480 Langley RG, Ellis CN. Evaluating psoriasis with Psoriasis Area and Severity Index, Psoriasis Global Assessment, and Lattice System Physician's Global Assessment. *J Am Acad Dermatol* 2004; **51**:563–9.
- 481 Kilic L, Erden A, Bingham CO *et al.* The reporting of patient-reported outcomes in studies of patients with rheumatoid arthritis: a systematic review of 250 articles. *J Rheumatol* 2016; **43**:1300–5.
- 482 Pinosky DG. Clinical assessment of the safety and efficacy of lorazepam, a new benzodiazepine derivative, in the treatment of anxiety. *J Clin Psychiatry* 1978; **39**:24–9.
- 483 Rich P, Scher RK. Nail Psoriasis Severity Index: a useful tool for evaluation of nail psoriasis. *J Am Acad Dermatol* 2003; **49**:206–12.
- 484 Leshem YA, Hajar T, Hanifin JM *et al.* What the Eczema Area and Severity Index score tells us about the severity of atopic dermatitis: an interpretability study. *Br J Dermatol* 2015; **172**:1353–7.
- 485 Mosteller RD. Simplified calculation of body-surface area. *N Engl J Med* 1987; **317**:1098.
- 486 Ware JE Jr, Sherbourne CD. The MOS 36-item Short-Form health survey (SF-36). I. Conceptual framework and item selection. *Med Care* 1992; **30**:473–83.
- 487 Zigmond AS, Snaith RP. The Hospital Anxiety and Depression Scale. *Acta Psychiatr Scand* 1983; **67**:361–70.
- 488 Rabin R, de Charro F. EQ-5D: a measure of health status from the EuroQol Group. *Ann Med* 2001; **33**:337–43.
- 489 Basra MK, Salek MS, Camilleri L *et al.* Determining the minimal clinically important difference and responsiveness of the Dermatology Life Quality Index (DLQI): further data. *Dermatology* 2015; **230**:27–33.
- 490 Hongbo Y, Thomas CL, Harrison MA *et al.* Translating the science of quality of life into practice: what do Dermatology Life Quality Index scores mean? *J Invest Dermatol* 2005; **125**:659–64.
- 491 Kahan BC, Rehal S, Cro S. Risk of selection bias in randomised trials. *Trials* 2015; **16**:405.
